# **A cerebellar-prepontine circuit for tonic immobility triggered by inescapable threat**

Ashwin A Bhandiwad<sup>1\*</sup>, Nickolas Chu<sup>1</sup>, Svetlana A Semenova<sup>1</sup>, Harold A Burgess<sup>1\*</sup>

<sup>1</sup> Division of Developmental Biology, Eunice Kennedy Shriver National Institute of Child Health and Human Development, Bethesda, MD 20892, USA

\* Correspondence: ashwin.bhandiwad@nih.gov, burgessha@mail.nih.gov ; 301-402-6018

1 **Abstract**

2

3 Sudden changes in the sensory environment are frequently perceived as threats and may provoke

4 defensive behavioral states. One such state is tonic immobility, a conserved defensive strategy

5 characterized by a powerful suppression of movement and motor reflexes. Tonic immobility has been

6 associated with multiple brainstem regions and cell types, but the underlying circuit is not known. Here,

7 we demonstrate that a strong vibratory stimulus evokes tonic immobility in larval zebrafish defined by

8 suppression of exploratory locomotion and sensorimotor responses. Using a circuit-breaking screen and

9 targeted neuron ablations, we show that cerebellar granule cells and a cluster of glutamatergic ventral

10 prepontine neurons (vPPNs) that express key stress-associated neuropeptides are critical components of

11 the circuit that suppresses movement. The complete sensorimotor circuit transmits information from

12 primary sensory neurons through the cerebellum to vPPNs to regulate reticulospinal premotor neurons.

13 These results show that cerebellar regulation of a neuropeptide-rich prepontine structure governs a

14 conserved and ancestral defensive behavior that is triggered by inescapable threat.

15

16

17

18

19

20

## 21 **Introduction**

22

23 Sudden changes in the environment may signal new threats. In response, animals often avoid detection by  
24 predators and facilitate threat assessment by suppressing physical activity (Klemm, 2001; Roseberry and  
25 Kreitzer, 2017; Yeomans and Frankland, 1995). Behavioral arrest is a common defensive strategy against  
26 predatory threat described in many vertebrate and invertebrate species (Gibson et al., 2015; Liang et al.,  
27 2015; Perrins et al., 2002; Sisneros et al., 1998; Zacarias et al., 2018) that forms part of the defense  
28 cascade, a continuum of behaviors that scale with perceived threat immediacy (Fanselow, 1994; Gallup,  
29 1977; Kozłowska et al., 2015; Marx et al., 2008). Physical activity is suppressed at each end of the  
30 defense cascade as part of responses to both distant and immediate threat. When peril is relatively low, for  
31 example at first detection of a predator cue, animals instigate avoidance behaviors. In the post-encounter  
32 phase of defensive behaviors, animals exhibit 'freezing' behavior, characterized by suppressed movement  
33 and heightened sensory acuity with increased readiness to flee. With escalating threat, animals initiate  
34 escape behaviors, and finally, when faced with imminent entrapment or actual capture, lapse into a  
35 catatonic-like state of 'tonic immobility'. The defense cascade presents a valuable model for resolving  
36 neural mechanisms that select and coordinate the expression of competing behavioral programs.

37

38 Freezing and tonic immobility are distinct behaviors within the defense cascade. Both behaviors are  
39 defined by behavioral arrest but are triggered by different levels of perceived threat and have converse  
40 effects on sensory responsiveness, muscle tone and postural control (Kozłowska et al., 2015). The core  
41 circuit for freezing behavior consists of the periaqueductal gray, although additional regions including the  
42 parabrachial nuclei, cortex, and cerebellum have been implicated (Dean et al., 1989; LeDoux and Daw,  
43 2018; Liang et al., 2015; Roelofs, 2017; Roseberry and Kreitzer, 2017; Tovote et al., 2016; Vaaga et al.,  
44 2020). In contrast, very little is known about the neural circuit basis for tonic immobility. States of tonic  
45 immobility have been described under different names, including 'phasic immobility', 'playing possum',  
46 'death feigning', and 'thanatosis' (Humphreys and Ruxton, 2018; Rogers and Simpson, 2014). In humans,

47 tonic immobility is linked to feelings of paralysis during traumatic events and is a major predictor of post-  
48 traumatic stress disorder severity (Kalaf et al., 2015; Marx et al., 2008; Volchan et al., 2017). Imminent  
49 threat or restraint induces a state in which animals are motionless and unreactive to external stimuli,  
50 possibly to reduce immediate predator aggression with the goal of escaping later. Paradoxically, animals  
51 in this state show increased EEG theta power, heart rate, and breathing rate, suggesting hyperarousal  
52 (Klemm, 2001). Early decerebration studies showed that the circuit for restraint-induced tonic immobility  
53 was localized to the brainstem (McBride and Klemm 1969, Klemm 1977) but the specific neural  
54 substrates and circuit connectivity for inducing tonic immobility are still unknown. How extreme threats  
55 initiate tonic immobility, over-riding the expression of alternative defensive behaviors, remains a  
56 fundamental question.

57

58 Both freezing behavior and tonic immobility occur in fishes. Freezing behavior has been studied as a  
59 response to electrical shock (Agetsuma et al., 2010; Duboué et al., 2017), exposure to alarm pheromones  
60 (Jesuthasan et al., 2020; Maximino et al., 2019; Speedie and Gerlai, 2008), and placement into a novel  
61 tank (Cachat et al., 2010). Several studies have also reported a state of tonic immobility in fish that  
62 manifests as prolonged inactivity, loss of responsiveness and suppression of righting reflexes, often after  
63 manual restraint or physical inversion (Assad et al., 2020; Carli, 1968; Crawford, 1977; Henningsen,  
64 1994; Lefebvre and Sabourin, 1977; Yoshida, 2021). In larval stage zebrafish, immobility is induced by  
65 an extreme vibratory stimulus well above intensity levels that normally induce escape responses raising  
66 the possibility of applying circuit neuroscience methods to unraveling a neuronal substrate for this  
67 behavior (Yokogawa et al., 2012).

68

69 Here, we demonstrate tonic immobility in larval zebrafish evoked by a persistent and inescapable threat  
70 and defined by behavioral arrest and reflex suppression. Using a genetic circuit breaking screen, targeted  
71 ablations, and imaging, we map a contiguous sensorimotor pathway for this terminal defensive behavior  
72 from primary mechanosensory neurons via the cerebellum and vPPNs to premotor reticulospinal neurons.

73 We show that vPPNs express multiple stress and homeostasis-related neuropeptides and are bilaterally  
74 activated by threatening stimuli. Finally, we propose a circuit model where multimodal sensory inputs act  
75 through the cerebellum to bilaterally activate vPPNs and trigger behavioral arrest by disrupting RoL1  
76 reticulospinal neuron activity. Together, these results reveal a novel sensorimotor circuit for this highly  
77 conserved defensive behavior that is activated when faced with an inescapable threat.

78

## 79 **Results**

80

### 81 **Repeated vibratory stimuli evoke locomotor arrest**

82 Intense vibratory stimuli elicit a sustained decrease in locomotor activity in zebrafish larvae (Yokogawa  
83 et al., 2012). To characterize this state, we delivered repeated pulsed high amplitude, low frequency  
84 stimulus using a vibration exciter and measured changes in swim speed relative to a 60 second pre-  
85 stimulus baseline (Fig 1A-B). Individual pulses elicited escape responses with  $83 \pm 5\%$  responsiveness  
86 and the stimulus was repeated for a 15 sec period – this simulated a persistent and inescapable threat.  
87 Following repeated stimulus presentation, larvae showed a persistent reduction in swimming which scaled  
88 with stimulus amplitude (Fig 1C-D). This reduction recovered to the pre-stimulus baseline level over the  
89 subsequent minute, with a half recovery time ( $T_{0.5}$ ) of 14-26 s (95% CI,  $n = 27$  larvae). For all subsequent  
90 experiments, we used a stimulus that decreased speed by 50% with a half-recovery time of 20 s (Fig  
91 S1A).

92

93 After the intense stimulus, remaining swim activity showed relatively straight trajectories compared to the  
94 looping paths observed during baseline conditions (Fig 1A, S1B). Kinematic analysis of high-speed video  
95 indicated that this was due to a change in swim bout type usage. Spontaneous movement in larvae  
96 primarily occurs as discrete bouts of slow forward swims and routine turns (Fero et al., 2011; Marques et  
97 al., 2018). Consistent with the switch to straight swim trajectories, during arrest, larvae showed a large  
98 reduction in the frequency of turn movements, with a smaller decrease in forward swim initiations (Fig

99 1E). Displacement per movement was also decreased (Fig 1E). Thus, during vibration-induced arrest, the  
100 decreased movement is due to a reduction in both initiation frequency of movement events and in the  
101 travel distance of each event.

102

103 In other species, reduced movement to threats can be classified as freezing or tonic immobility through  
104 differential effects on sensorimotor reflexes including modulation of the righting reflex, a vestibular  
105 reflex that restores dorsoventral orientation when the animal is restrained and inverted (Jänicke and  
106 Coper, 1996) — freezing facilitates whereas tonic immobility suppresses these responses (Fanselow,  
107 1994; Gallup and Rager, 1996). Therefore, to differentiate between freezing and tonic immobility, we  
108 investigated changes to sensorimotor reflexes during behavioral arrest.

109

110 At baseline, zebrafish consistently exhibit a dorsal-up posture. As in other animals, inversion or forced  
111 side-lying evokes a vestibulomotor self-righting reflex to restore the dorsal-up posture (Bagnall and  
112 McLean, 2014; Favre-Bulle et al., 2017). We tested whether the righting reflex was suppressed during  
113 behavioral arrest by presenting a brief high intensity low frequency stimulus that disrupted balance.  
114 Destabilizing larvae during the arrest state increased the likelihood of inversion and delayed restoration of  
115 the dorsal-up posture compared to baseline, demonstrating a disruption of the righting reflex, consistent  
116 with tonic immobility (Fig 1F). Moreover, acoustic-evoked startle and visual reflexes were suppressed  
117 during arrest (Fig 1G). Thus, after intense vibration, zebrafish show arrested movement, suppression of  
118 sensorimotor responses and loss of the righting reflex, all characteristic features of tonic immobility as  
119 manifest in other species under extreme threat.

120

121 Early work in rabbits suggested that immobility reflected inhibition of spinal motor circuits (Klemm,  
122 1976). We tested whether motor circuit function was altered during arrest by direct activation of  
123 Mauthner cells with an electrical pulse stimulus (Tabor et al., 2014) . Electric pulse-initiated escapes

124 were normal and kinematic analysis of remaining visual and acoustic responses performed during arrest  
125 showed no changes in escape bend angle or displacement (Fig S1C, 2). It is therefore unlikely that motor  
126 circuits are directly suppressed during behavioral arrest. Rather, reduced movement reflects a change in  
127 premotor activity that initiates and sustains movement.

128

129 To reveal neurons that mediate behavioral arrest, we conducted a circuit breaking screen using a library of  
130 transgenic Gal4 enhancer trap lines (Bergeron et al., 2012, 2015). Fish expressing Gal4 in specific  
131 neuronal populations were crossed to transgenic UAS:epNTR-RFP, a variant of nitroreductase that  
132 converts the prodrug metronidazole into a cell-specific toxin (Horstick et al., 2015; Marquart et al., 2015)  
133 (Fig 2A). We screened 31 Gal4 lines and recovered three lines (*y318-Gal4*, *y334-Gal4*, and *y405-Gal4*)  
134 where vibration-induced arrest was diminished in ablated larvae (Fig 2B-C, Fig S3A; full 3D expression  
135 can be visualized at [zbbrowser.com](http://zbbrowser.com)). Ablations did not affect baseline activity in *y318-Gal4* or *y334-*  
136 *Gal4*, whereas spontaneous swimming was reduced in *y405-Gal4* (Fig 2C, S3B). All three lines showed a  
137 similar recovery time to controls (Fig S3C), suggesting that the underlying neurons initiate arrest rather  
138 than regulating duration. Furthermore, disruption of vibration-induced arrest did not generalize to electric  
139 shock-induced freezing (Fig S4) indicating that vibration-induced arrest was independent of a previously  
140 described pathway for freezing behavior (Agetsuma et al., 2010; Duboué et al., 2017).

141

## 142 **Mechanosensory inputs induce arrest via a cerebellar pathway**

143 Each of the three Gal4 lines labeled neurons in multiple brain regions. To isolate the arrest-related  
144 neurons within these lines, we first analyzed *y318-Gal4*, which had prominent expression in the  
145 cerebellum accompanied by sparse clusters in other brain regions. We used an intersectional method to  
146 selectively label and ablate the cerebellar cluster by crossing *y318-Gal4*;UAS:flox-GFP-epNTR fish to  
147 *y520-Cre* which has prominent overlapping expression only in the cerebellum (Tabor et al., 2019).

148 Ablation of cerebellar neurons in *y318-Gal4* (Fig. 3A-B) significantly reduced behavioral arrest following  
149 vibratory stimuli (Fig 3C) with a similar effect size to complete *y318-Gal4* ablation, indicating that the

150 cerebellar neurons are the relevant subpopulation. *y318-Gal4* cerebellar neurons colocalized with  
151 NeuroD-eGFP, a known marker of granule cells (Takeuchi et al., 2015; Volkmann et al., 2008) (Fig 3D)  
152 and were largely distinct from the *gad1b* expressing cerebellar neurons (Fig 3E). These data identify  
153 *y318-Gal4* cerebellar granule cells as a component of the arrest-induction circuit.

154

155 Involvement of the cerebellum in initiating arrest led us to investigate input and output pathways. Granule  
156 cells receive direct input from auditory/vestibular and lateral line ganglia in multiple fish species (Dohaku  
157 et al., 2019; Maruska and Tricas, 2009; McCormick et al., 2016; New and Northcutt, 1984). Given that  
158 mechanosensory stimuli were used to evoke arrest, we asked whether primary mechanosensory afferents  
159 also project to the cerebellum in zebrafish. We labeled afferents by expressing UAS:eGFP-CAAX, a  
160 marker for cell membranes, in *y397-Gal4*, which labels the flow sensing anterior and posterior lateral line  
161 ganglia, and *y256-Gal4*, which labels part of the auditory/vestibular processing posterior statoacoustic  
162 ganglion. As described in previous studies, auditory (Fig 4A-B) and lateral line (Fig 4C-D) afferents both  
163 terminated in close proximity to the granule cells of the eminentia granularis (Fig 3E).

164 Afferent inputs from the lateral line and auditory system into the cerebellum suggested that these sensory  
165 modalities are required for evoking arrest. As our arrest-inducing stimulus potentially activated multiple  
166 sensory modalities, we tested the role of visual, acoustic/vestibular, lateral line, and somatosensory  
167 systems. We disrupted auditory and vestibular inner ear function by ablating posterior statoacoustic  
168 ganglion neurons labeled in *y256-Gal4* with UAS:epNTR-RFP and found no effect on arrest (Fig 4F; Fig  
169 S5A). We then ablated the flow-sensing lateral line neuromasts using bath application of 250 uM  
170 neomycin (Fig S5B). Neomycin ablation reduced arrest by 30% compared to non-treated controls.  
171 However, combined ablation of posterior auditory afferents and lateral line neuromasts led to a total loss  
172 of arrest, indicating that both flow and acoustic/vestibular information coordinately drive arrest. In  
173 contrast, arrest was induced normally when we conducted the experiment in darkness to remove visual  
174 cues or disrupted somatosensory inputs. These data indicate that inner ear and lateral line signals evoke  
175 behavioral arrest via inputs to eminentia granularis granule cells.



176

## 177 **Glutamatergic prepontine neurons are critical for arrest**

178 Having established that inner ear and lateral line signaling to cerebellar granule cells forms part of the  
179 circuit that initiates arrest, we searched for other components of the circuit by examining arrest-related  
180 neurons within *y405-Gal4* and *y334-Gal4*. Although these lines express Gal4 in multiple brain regions, a  
181 cluster of ventral prepontine neurons (vPPNs) were labeled in both, making them strong candidates (Fig  
182 5A). Targeted multiphoton laser ablation of vPPNs significantly decreased arrest (Fig 5B-C) in a similar  
183 magnitude to *y334-Gal4* ablation (Fig 2C).

184

185 vPPNs are located in a rostral part of the hindbrain that comprises multiple neuronal cell groups  
186 (Kinkhabwala et al., 2011; Watson et al., 2019), including glutamatergic, GABAergic, and cholinergic  
187 neurons and the noradrenergic locus coeruleus. vPPN neurons labeled by *y334-Gal4* and *y405-Gal4*  
188 showed considerable overlap, but *y334-Gal4* had greater expression in the rostral and lateral vPPN (Fig  
189 5G). To further characterize vPPNs, we performed colocalization imaging experiments with transgenic  
190 lines that label major neurotransmitters (Fig 5D). The majority of vPPNs (97%, 288/296 cells from n = 5  
191 fish) colocalized with *vglut2a:GFP* indicating that these neurons are primarily glutamatergic. vPPNs did  
192 not colocalize with GABAergic neurons labeled by *gad1b:dsRed* and were adjacent to, but did not overlap  
193 with, cholinergic (*vachta:GFP*) neurons. Intriguingly, cells expressing *vmat2:GFP*, which labels the locus  
194 coeruleus, were interspersed with caudal vPPNs but we did not find vPPNs that co-expressed GFP (n=108  
195 neurons, Fig 5D-E). To better understand vPPN identity, we analyzed transcriptomes of prepontine  
196 neurons from *y334-Gal4* and *y405-Gal4* using RNA sequencing (Fig 5F, H-I). Confirming that we  
197 correctly isolated the prepontine neurons from these lines, both *y334-Gal4* and *y405-Gal4* transcriptomes  
198 showed enrichment for engrailed 1b (*eng1b*), which is expressed at the midbrain-hindbrain boundary  
199 (Ekkert et al., 1992). Among the most highly enriched transcripts in vPPNs were several stress-associated  
200 neuropeptides, including corticotropin releasing hormone b (*crhb*), thyrotrophin releasing hormone (*trh*),  
201 and urotensin 1 (*uts1*) (Fig 5H-I). Together, these data define a novel area for defensive responses in the

202 preoptine tegmentum, consisting of glutamatergic cells that coexpress multiple neuropeptides, that is  
203 bounded caudally by the locus coeruleus and laterally by cholinergic cells of the nucleus isthmi  
204 (Henriques et al., 2019)(Fig 5E).

205

## 206 **Cerebellar Purkinje neurons project to preoptine arrest neurons**

207 vPPNs were positioned in the tegmentum directly below the cerebellum raising the possibility of a direct  
208 connection as part of the arrest circuit. We therefore examined efferent projections of Purkinje cells in  
209 *aldoca-Gal4;UAS:eGFP-CAAX* transgenic larvae. Along with the previously reported caudal projection  
210 to the statoacoustic ganglion (Bae et al., 2009; Matsui et al., 2014) (Fig. 6A, yellow arrows), we noticed a  
211 small rostroventral projection from lateral *aldoca-Gal4* neurons. These Purkinje cell projections  
212 terminated within the caudal vPPN (Fig 6A, white arrows) and suggested that Purkinje cells are  
213 presynaptic partners of vPPNs. Because Purkinje cells are GABAergic, we asked whether vPPNs receive  
214 inhibitory inputs. Labelling the post-synaptic inhibitory synapses formed by vPPN neurons using *y334-*  
215 *Gal4, UAS:gephyrin-FingR-mCherry* transgenic larvae (Son et al., 2016) revealed that a subset of vPPNs,  
216 in a similar caudal region to the area receiving Purkinje neurons projections, showed mCherry  
217 fluorescence (Fig 6B, white arrows), supporting the idea that these neurons receive inhibitory input. We  
218 therefore pharmacologically manipulated GABAergic signaling. Treatment with either GABA or ethanol,  
219 an indirect GABA-A receptor agonist, reduced vibration-induced behavioral arrest (Fig. 6C-D). After  
220 ethanol washout, larvae recovered fully within 20 min. Because bath applied treatments likely affected  
221 GABA signaling throughout the brain, we tested whether blocking GABA<sub>A</sub> receptor signaling  
222 specifically in vPPNs suppressed arrest. To do so, we generated a *UAS:ICL-GFP* construct to express the  
223 intracellular loop (ICL) from the GABA<sub>A</sub> receptor  $\gamma 2$  subunit in vPPNs (Fig 6E). Expression of this  
224 peptide in *Xenopus* reduces GABA<sub>A</sub> currents resulting in decreased GABA-mediated behaviors (Shen et  
225 al., 2009, 2011). *y334-Gal4* fish expressing *UAS:ICL-GFP* showed reduced behavioral arrest (Fig 6F),  
226 whereas controls that expressed a mutant form of the ICL that does not block GABAergic signaling (Shen

227 et al., 2009) responded normally (Fig 6F). Together, these data suggest that GABAergic inhibition of  
228 vPPN neurons, potentially by direct input from Purkinje cells, plays a central role in evoking behavioral  
229 arrest in response to an overwhelming threat.

230

### 231 **Preoptine arrest neurons increase activity following persistent flow stimuli**

232 To test whether vPPNs respond to threat, we measured changes in phosphorylated ERK (pERK), a marker  
233 for neural activity, using immunohistochemical labeling after exposure to the intense vibratory stimulus  
234 (Randlett et al., 2015). After exposure, larvae were fixed, labeled, imaged, and co-registered. Stimulation  
235 led to increased pERK/tERK ratios in the posterior tuberculum, midbrain tegmentum and preoptine  
236 regions including in the area occupied by vPPNs (Fig 7A-B). However, because changes in pERK lag  
237 neuronal activity by around 2 min (Dai et al., 2002), it was possible that the pERK signal reflected peri-  
238 stimulus activation preceding behavioral arrest. We therefore examined vPPN activity to intense flow  
239 stimuli at higher time resolution by expressing a nuclear localized UAS:GCaMP6s in *y334-Gal4* and  
240 measuring changes in fluorescence following an intense pulsed flow stimulus in a head-fixed preparation  
241 (Fig 7C-E). A subset of vPPNs ( $n = 41/420$  neurons from 8 fish) showed a strong increase in fluorescence  
242 after several seconds of flow stimulation (Fig 7D-E). Cells with increased GCaMP6s fluorescence were  
243 highly stereotyped and robust in their responses to successive stimuli (Fig S7). The increase in GCaMP6s  
244 fluorescence was delayed and GCaMP6s fluorescence peaked in stimulus-responsive cells at the cessation  
245 of the stimulus. This delayed increase cannot be accounted for by nuclear-localized GCaMP6s kinetics,  
246 which peaks  $\sim 1.1$  s after activation (Förster et al., 2017) and therefore suggests that vPPN activity builds  
247 during exposure to an overwhelming threat.

248

249 If vPPNs were activated during arrest-inducing stimuli, we reasoned that activating vPPNs would evoke  
250 arrest in the absence of vibrational stimuli. We expressed the channelrhodopsin variant UAS:CoChR,  
251 which has been shown to produce robust activation in zebrafish neurons (Antinucci et al., 2020).  
252 Photoactivation in free swimming *y334-Gal4;UAS:CoChR* fish (Fig 7F) resulted in significant locomotor

253 suppression after photoactivation, whereas sibling controls lacking UAS:CoChR showed no change in  
254 motor activity (Fig S8). Consistent with vPPN ablation eliminating arrest, vPPN activation simulated  
255 exposure to an intense threat and induced arrest.

256

### 257 **Prepontine neurons contact premotor reticulospinal neurons**

258 The critical role of vPPNs in evoking arrest led us to map efferent targets of vPPNs. We labeled  
259 individual *y334-Gal4* neurons using an intersectional approach combining UAS:blo-GFP-blo-lynTagRFP  
260 and a heat shock-inducible B3 recombinase (Tabor et al., 2018), taking advantage of the inefficiency of  
261 B3 recombinase in zebrafish to facilitate sparse labeling (Fig 8A). After imaging, registering, and  
262 reconstructing these neurons (13 neurons from 5 fish), we identified three classes of vPPNs, two of which  
263 projected ventrally to a dense neuropil region (Fig 8B). The first class (represented by  $n = 7$  neurons)  
264 projected ventrally to an ipsilateral neuropil region between the hypothalamus and the tegmentum. We  
265 noted that these projections travelled, within the margin of registration error, adjacent to the cell body of  
266 RoL1 neurons, a cluster of reticulospinal neurons that project to the spinal cord (Gahtan and O'Malley,  
267 2003) that drive forward locomotor bouts and stimulus-evoked turns (Lovett-Barron et al., 2020; Orger et  
268 al., 2008) (Fig 8B). A second class of vPPNs ( $n = 5$  neurons) projected ventrally to the ipsilateral RoL1s  
269 and also crossed the midline to terminate near the contralateral RoL1 cluster. Contralateral projections  
270 were ordered rostrocaudally with rostral vPPN axons terminating in the rostral contralateral RoL1. The  
271 third class ( $n = 2$  neurons) projected anteriorly to the hypothalamus and torus semicircularis. To test  
272 whether vPPN termini contacted RoL1 neurons, we expressed UAS:synaptophysin-RFP in *y334-Gal4* and  
273 backfilled RoL1s using fluorescently labeled dextran injected into the spinal cord. Fluorescent puncta  
274 from vPPN presynapses colocalized with RoL1 cell bodies (Fig 8C-D). We also observed numerous  
275 presynaptic puncta in the neuropil region surrounding RoL1 neurons.

276 To test whether RoL1s were part of the arrest pathway, we ablated them using a multiphoton laser before  
277 testing for changes in locomotor behavior and vibration-evoked arrest. We confirmed previous reports  
278 that RoL1 ablation reduced baseline locomotor behavior (Lovett-Barron et al., 2020; Orger et al., 2008)

279 (Fig 8E, S6A). RoL1 ablated fish also showed a loss of behavioral arrest following vibratory stimuli (Fig  
280 8F). Importantly, analysis of swim path trajectories showed that RoL1 ablation not only suppressed  
281 overall displacement, but also resulted in straight-line swim trajectories observed during arrest (Fig 8E).  
282 Kinematic analysis using high speed recordings showed that RoL1 ablation led to a specific reduction in  
283 turn bouts, with forward swims relatively spared (Fig 7F, S6B). These results support a model in which  
284 RoL1 neurons promote baseline locomotion that is suppressed via vPPNs in response to severe threat.

285

## 286 **Discussion**

287 Understanding how animals perceive threatening stimuli and rapidly initiate defensive responses is  
288 fundamental for understanding cognitive states such as fear (LeDoux, 2000). Our data reveal that larval  
289 zebrafish, when presented with an intense and inescapable threat stimulus, respond with behavioral arrest  
290 with characteristic features of tonic immobility. As observed in mammals, reptiles, and birds, tonic  
291 immobility in zebrafish manifests as an innate response defined by locomotor suppression, lack of  
292 responsiveness to external stimuli, and delays in the righting reflex. The magnitude and persistence of this  
293 state is intensity dependent as described in chick (Gallup, 1977) and lizards (Edson and Gallup, 1972). We  
294 note that tonic immobility has other behavioral and physiological correlates that we did not measure,  
295 including decreased heart rate and increased respiration, tremor, and changes in correlated neural activity  
296 (Kozłowska et al., 2015; Yoshida, 2021). Further investigation will elucidate whether zebrafish exhibit  
297 these physiological changes and may reveal further core conserved elements of this behavior.

298

299 Based on our data, we propose a sensory afferent-cerebellar-prepontine circuit in which vPPNs are crucial  
300 for initiating arrest following turbulent flow stimuli (Fig 9). In this model, at baseline, vPPNs show low  
301 levels of activity allowing RoL1s to propel normal locomotor activity. Transient threats may evoke  
302 escape responses, but in the face of persistent danger, combined flow and auditory/vestibular inputs to  
303 granule cells stimulate cerebellar activity and increase GABAergic Purkinje cell output. Following  
304 prolonged stimulation, loss of GABAergic signaling elicits post-inhibitory rebound firing in vPPNs which

305 in turn suppresses RoL1 firing and therefore disrupts swimming. This model describes a central pathway  
306 by which inescapable threatening stimuli induce behavioral arrest in zebrafish and may serve as a model  
307 for conserved pathways that mediate tonic immobility in other species.

308

309 In our working model, persistent Purkinje cell inhibition elicits post-inhibitory vPPN activation. GABA  
310 facilitation and *y334-Gal4* specific GABA<sub>A</sub> receptor blockade both disrupted vibration-evoked behavioral  
311 arrest (Fig 6C-E). Although these results appear contradictory, we propose that blocking initial  
312 GABAergic signaling suppresses inhibition whereas pharmacological GABA facilitation may prevent the  
313 sudden offset of inhibition. Both experiments would thus disrupt post-inhibitory firing in vPPNs and lead  
314 to the same behavioral outcome. Post-inhibitory rebound firing has been demonstrated in glutamatergic  
315 targets of Purkinje cells (Aizenman and Linden, 1999; Witter et al., 2013; Zheng and Raman, 2009), and  
316 in thalamocortical neurons (Sohal et al., 2006), suprachiasmatic nucleus of the hypothalamus (Tremere et  
317 al., 2008), and amygdala (Ryan et al., 2012). In these circuits, post-inhibitory rebound facilitates  
318 synchronization of multiple neuron populations (Ryan et al., 2012; Sohal et al., 2006) similar to the  
319 bilateral activation of vPPNs neurons in our experiments (Fig 7D-E). Our model is limited by our  
320 incomplete understanding of direct synaptic and functional connectivity between Purkinje cells and  
321 vPPNs. Nevertheless, we propose that synchronized post-inhibitory activation after prolonged cerebellar  
322 inhibition is a plausible mechanism for arrest and invite future experiments to explicitly test this  
323 hypothesis.

324

325 How does bilateral activation of glutamatergic vPPNs result in locomotor inhibition? vPPNs project  
326 bilaterally to RoL1 reticulospinal neurons (Fig 8B-D) and bilateral RoL1 ablation leads to a decrease in  
327 activity similar to vPPN activation (Fig 8E-G). vPPNs show strong expression of several stress-associated  
328 neuropeptides including *crhb*, *trh* and *uts1*. Co-release of these neuropeptides with glutamate may  
329 suppress or disrupt RoL1 function, leading to behavioral arrest. Alternatively, vPPNs may modify other  
330 inputs to RoL1 neurons – RoL1s are located in a dense neuropil that receives projections from many brain

331 regions (Barrios et al., 2020; Lovett-Barron et al., 2020). vPPNs make synaptic contacts within this  
332 neuropil (Fig 5C) and may therefore influence other convergent pathways that influence turning behavior.  
333  
334 Our data defines a new region within the preoptine tegmentum that mediates responses to persistent  
335 threat. Neurons in the vPPN form a characteristic crescent shape in both *y334-Gal4* and *y405-Gal4*  
336 transgenics, but these lines have slightly different domains of expression in this region, potentially  
337 explaining why *y405-Gal4* ablation had a greater effect on behavioral arrest initiation than *y334-Gal4*  
338 ablation (Fig 2C). The difference and is also consistent with our observation that the caudal vPPN, which  
339 contains more *y405-Gal4* neurons, has greater activation following pulsed flow stimuli (Fig 8F). RNA  
340 sequencing from *y334-Gal4* and *y405-Gal4* show that vPPNs in both lines are enriched in *crhb*, the teleost  
341 homolog of corticotropin releasing hormone (CRH), which is consistent with *in situ* hybridization studies  
342 (Alderman and Bernier, 2009; Chandrasekar et al., 2007). CRH is a prominent regulator of the  
343 hypothalamus-pituitary-adrenal axis and CRH receptor activation in rodent amygdala and periaqueductal  
344 grey facilitates defensive behaviors, including tonic immobility (Sherman and Kalin, 1988; Spinieli and  
345 Leite-Panissi, 2018). However, it is possible that *crhb* may only identify these neurons and that *crhb*  
346 function may be dispensable for tonic immobility.  
347  
348 vPPNs are bounded by the locus ceruleus and nucleus isthmi (the teleost homolog of the parabrachial  
349 nucleus) (Fig 5D). In mammals a similar neuroanatomical region comprises the parabrachial complex, a  
350 structure in the preoptine region lateral to the locus ceruleus that is dissected by the superior cerebellar  
351 peduncles (Fulwiler and Saper, 1984; Palmiter, 2018). Intriguingly, the parabrachial nucleus has been  
352 implicated in both tonic immobility (Klemm, 2001; Menescal-de-Oliveira and Hoffmann, 1993) and  
353 freezing in mouse (Bowen et al., 2020; Han et al., 2015). In mammals, the parabrachial nucleus integrates  
354 aversive stimuli and serves as a general alarm system for threats (Barik et al., 2018; Chiang et al., 2019;  
355 Palmiter, 2018). Like vPPNs, most parabrachial neurons are glutamatergic and are enriched in CRH  
356 expression (Palmiter, 2018). Thus, based on similarity of position, function, and gene expression, we

357 provisionally propose that vPPNs are homologous to a subnucleus of the mammalian parabrachial  
358 complex. Future experiments examining molecular markers of the parabrachial nucleus and functional  
359 connectivity may provide more direct evidence for homology. If so, our data would indicate that the  
360 parabrachial complex has a deep evolutionary history in promoting defensive responses.

361

362 Our results identified the cerebellum as a key structure in vibration-induced arrest. Indeed, cerebellar  
363 inactivation suppresses freezing and tonic immobility in mammals (Koutsikou et al., 2014; McBride and  
364 Klemm, 1969; Supple et al., 1988) and *cerebelless* mouse mutants, which lack GABAergic neurons in the  
365 cerebellar nuclei, fail to show tonic immobility when restrained by neck pinch (Esposito et al., 2013).  
366 Moreover, the cerebellum is known to encode painful stimuli and modulate defensive responses in rats  
367 (Saab and Willis, 2003), suggesting a broader role for the cerebellum in defensive behaviors. Similarly,  
368 teleost Purkinje cells show increased tonic firing following a sudden change in the sensory environment  
369 (Hsieh et al., 2014). We found that behavioral arrest required coordinated signals from the auditory and  
370 lateral line systems. Granule cells of the eminentia granularis receive input from both pathways and are  
371 therefore a likely point of sensory integration (Ishikawa et al., 2015; Sawtell, 2010) (Fig 4E). The partial  
372 disruption of immobility in *y318-Gal4* granule cell ablation compared to total loss of immobility in  
373 combined lateral line and auditory/vestibular ablations may indicate that *y318-Gal4* labels only a subset  
374 of granule cells, or that a second pathway processes sensory threats. Understanding how lateral line and  
375 auditory/vestibular information converges in granule cells to evoke arrest remains an open question.

376

377 Defensive behaviors associated with fear are instances of ‘emotion primitives’, a conceptual framework  
378 that defines internal states with behavioral characteristics that scale with intensity, valence, and  
379 persistence (Anderson and Adolphs, 2014). This study shows that tonic immobility in larval zebrafish  
380 meets these criteria and outlines the underlying circuit. Our data disclose that vPPNs play a central role  
381 in behavioral state control by activating the terminal behavior in the defense cascade. Understanding how



382 the vPPNs over-ride expression of other defensive behaviors will help us better understand how animals  
383 assess risk and match defensive responses to perceived threat.

384

385

386

387

388

389

390

391

392

393

394

395

396

397

398

399

400

401

402

403

404

405

406

407

408 **Figure legends**

409 Figure 1: Repeated vibratory stimuli evoke tonic immobility with behavioral arrest and reflex suppression

410 A (Left) Schematic of apparatus used to evoke behavioral arrest. Individual fish are placed into a  
411 single well of a 3x3 grid plate attached to a minishaker that delivers vibratory stimuli. The arena  
412 is lit from below using an LED array and imaged using a low (30 fps) or high-speed (1000 fps)  
413 camera. (Right, Top) Individual locomotion traces from a single fish during baseline and post-  
414 stimulus phases. Color represents speed in a 5 sec epoch. (Right, Bottom) Individual fish  
415 positions during 10 s epochs of baseline (A, B) arrest (C, D) and recovery (E, F) phases –  
416 saturation indicates time within epoch.

417 B Raster plot of individual fish speed (mm/s; n = 51 fish) for the duration of the experiment. Each  
418 line represents speed of an individual fish measured in 5 s epochs and color represents speed  
419 relative to the average baseline speed. Gap in data corresponds to vibratory stimulus presentation.

420 C Arrest magnitude is proportional to stimulus magnitude. Traces showing speed (relative to the  
421 average baseline speed) after 15 s arrest-inducing stimuli of 0 dB (no stimulus), 14 dB, 20 dB,  
422 and 26 dB re. 1 m/s<sup>2</sup> (n = 27 fish). Shaded area for each trace is SEM. Arrest magnitude is  
423 stimulus-dependent (ANOVA; p < 0.001).

424 D Boxplots showing change in speed (mm/s) at the first epoch following stimulus presentation  
425 compared with the pre-stimulus baseline at 14 dB, 20 dB, 23 dB, and 26 dB re. 1 m/s<sup>2</sup> (n = 27 fish  
426 per condition). \* p < 0.05, \*\*\* p < 0.001

427 E Kinematic analysis of changes in initiation frequency and displacement during arrest for turns  
428 (blue) and forward swims (magenta). (Top) Examples of turns and forward swims. (Middle)  
429 Individual traces showing changes in initiation frequency (Left) and displacement for each bout  
430 (Right) during baseline and arrest states. (Bottom) Estimated effect sizes for difference in  
431 responsiveness after stimulus compared to pre-stimulus baseline. Data plotted as Mean ± 95% CI.  
432 Horizontal line denotes an effect size of 0.

433 F (Left) Righting reflex, measured as the proportion of unbalanced fish following destabilizing  
434 stimulus (n = 10 groups with 5 fish per group) in control (grey) and arrest (red) conditions.  
435 Individual lines represent groups of 5 fish and shaded area is SEM. (Right) Estimation plot for  
436 time to return to balanced calculated for each group of fish in control (grey) and arrest (red)  
437 conditions.

438 G (Left) schematic diagram of acoustic and dark flash stimuli. (Right) Changes in acoustic short-  
439 latency startle (n = 27 fish) and dark-flash evoked O-bend responses (n = 27 fish) during arrest  
440 (Mean  $\pm$  SEM). Responsiveness is significantly suppressed during arrest compared to baseline \*\*  
441  $p < 0.01$ , \*\*\*  $p < 0.001$ , Repeated-Measures ANOVA.

442

443 Figure 2: A genetic circuit-breaking screen identifies three lines that contain neurons required for evoking  
444 arrest.

445 A Schematic diagram for circuit-breaking screen using 31 enhancer-trap Gal4 lines. Fish were  
446 crossed to UAS:epNTR-RFP and treated with 10 mM metronidazole for 24-48 hours to ablate  
447 discrete sets of neurons. Fish were tested 24 hours after ablation at 6 dpf for vibration-evoked  
448 arrest.

449 B Dorsoventral projection of Gal4 patterns in three lines, *y318-Gal4* (Left), *y334-Gal4* (Middle) and  
450 *y405-Gal4* (Right) which showed disruption of arrest following stimulation. Projection is  
451 pseudocolor depth coded, D = Dorsal, V = Ventral. All three lines show HuC expression (grey) as  
452 counter-label.

453 C Arrest disruption in lines shown in [B]. Arrest defined as the change in speed (mm/s) between  
454 baseline and the first epoch following stimulation in ablated (red) and sibling controls (grey).  
455 *y318-Gal4* (n = 23 control, 26 ablated), *y334-Gal4* (n = 21 control, 24 ablated), *y405-Gal4* (n =  
456 18 control, 12 ablated). \*\*  $p < 0.01$ , \*\*\*  $p < 0.001$ , independent samples t-test

457

458 Figure 3: Cerebellar granule cells in *y318-Gal4* are part of the arrest circuit

- 459 A Schematic of intersectional ablation approach using Gal4 and Cre to subdivide *y318-Gal4* and  
460 spatially restrict NTR expression and ablate Gal4/Cre intersect neurons.
- 461 B Maximum projections of *y318-Gal4* (red) and *y520-Cre* (cyan) expression patterns. (Bottom)  
462 Neurons labeled by NTR in *y318-Gal4/y520-Cre* intersect (n = 3 fish).
- 463 C Ablated *y318-Gal4/y520-Cre* intersect neurons (red, n = 12 fish) show reduced locomotor  
464 suppression compared to controls (grey, n = 9 fish). Wilcoxon Rank-Sum test  $p = 0.01$ .
- 465 D Maximum projection of *y318-Gal4;UAS:kaede* (green) and NeuroD-eGFP (red) expression  
466 shows colocalization of cerebellar *y318-Gal4* neurons and NeuroD (merge). Kaede was  
467 photoconverted prior to imaging. Scale bar: 50  $\mu\text{m}$
- 468 E Maximum projection of *y318-Gal4;UAS:kaede* (green) and *gad1b-RFP* (magenta) shows that  
469 cerebellar *y318-Gal4* neurons are separate from GABAergic neurons. Scale bar: 50  $\mu\text{m}$

470

471 Figure 4: Acoustic and lateral line inputs converge onto lateral cerebellar granule cells to drive arrest

- 472 A-B Dorsal and lateral view of *y256-Gal4;UAS:eGFP-CAAX* labeled neurons (magenta) from the  
473 posterior statoacoustic ganglion (SAG, magenta arrow) which send projections that terminate in  
474 the eminentia granularis (EG) of the cerebellum (white arrows). (Right) Overlay of *y318-Gal4*  
475 neurons with SAG neurons. Inset: location of imaged area. Scale bar: 30  $\mu\text{m}$
- 476 C-D Dorsal and lateral view of *y397-Gal4;UAS:eGFP-CAAX* labeled neurons (red) from anterior  
477 (aLLn) and posterior (pLLn) lateral line which send projections that terminate in the EG (white  
478 arrows). (Right) Overlay of *y318-Gal4* neurons with lateral line neurons. Inset: location of  
479 imaged area. Scale bar: 30  $\mu\text{m}$
- 480 E. Dorsal (Top) and coronal (Bottom) views of 3D reconstruction of SAG neurons from [A]  
481 (magenta) and neurons from the anterior lateral line ganglion (aLLG) and posterior lateral line  
482 ganglion (pLLG) (red) show that both inputs converge to the EG labeled by *y318-Gal4* neurons  
483 (green). D = Dorsal, M = Medial, R = Rostral. Scale bar: 50  $\mu\text{m}$ .

484 F. Effects of removing visual cues (Dark; n = 17 control, n = 18 dark), auditory cues via *y256-Gal4*  
485 ablation (SAG Abl, n = 23 control, n = 24 ablated), lateral line cues with 200  $\mu$ M neomycin  
486 treatment (Lateral line abl, n = 27 control, n = 26 ablated), combined SAG and lateral line cues  
487 (n = 18 control, n = 16 ablated), and somatosensory cues using *y234-Gal4* ablation (Trigeminal  
488 abl, n = 16 control, n = 9 ablated) on arrest following vibratory stimulus. Lateral line ablation  
489 suppressed arrest ( $F_{1,52} = 14.28$ ,  $p = 0.0004$ ) and combined SAG and lateral line ablation also  
490 suppressed arrest ( $F_{1,33} = 11.98$ ,  $p = 0.001$ ). \*\*\*  $p < 0.001$ , \*\*  $p < 0.01$

491

492 Figure 5: Multiple neuropeptide-expressing glutamatergic vPPNs in *y334-Gal4* and *y405-Gal4* are  
493 essential for triggering arrest

- 494 A. Computational predicted overlap between *y334-Gal4* and *y405-Gal4* (black pixels) shows a  
495 common set of preoptine neurons (outlined by red circles). HuC (grey) used as counter-label.
- 496 B. Example of multiphoton ablation of *y405-Gal4* vPPNs showing maximum projections of sham  
497 ablated vPPNs (Top) and bilaterally ablated vPPNs (Bottom). Circles highlight approximate  
498 boundaries of vPPN. Scale bar: 40  $\mu$ m
- 499 C. Behavioral arrest in control (grey, n = 20 fish) and *y405-Gal4* ablated (red, n = 10 fish) shown as  
500 change in speed following vibrational stimuli. Wilcoxon Rank Sum test,  $p < 0.001$ .
- 501 D. (Top) Overlay of *y405-Gal4*;UAS:kaede (cyan), glutamatergic neurons specified by vglut-GFP  
502 (red), and overlay of both. Kaede was photoconverted before imaging. R = Rostral, L = lateral.  
503 Scale bar: 25  $\mu$ m. (Bottom) Overlay of *y405-Gal4* (cyan) with *gad1b* (Left), *vmat2* (Middle),  
504 and *vachta* (Right) neurons. Inset: schematic of imaging window relative to zebrafish brain.  
505 Scale bar: 25  $\mu$ m.
- 506 E. Dorsal view of 3D reconstruction of *y405-Gal4* vPPNs (white), noradrenergic neurons of the  
507 locus coeruleus (LC) labeled by *vmat2*-GFP (yellow), cholinergic neurons of the nucleus of the  
508 isthmus (NI), and GABAergic neurons (red). Imaging was conducted on individual lines and

509 registered to a common reference before analysis. Dotted line shows midbrain-hindbrain  
510 boundary (MB/HB).

511 F. Schematic of selected neuron RNA sequencing used to identify neurotransmitter identity of  
512 vPPNs. vPPNs from *y334-Gal4/y405-Gal4* are dissected, dissociated, and plated onto a petri  
513 dish. Following visual selection for kaede-expressing neurons, samples undergo library  
514 preparation and RNA sequencing.

515 G. Maximum projection of *y334-Gal4* (blue) and *y405-Gal4* (orange) expression in vPPNs.  
516 Schematic shows approximate imaging window in the fish brain. Scale bar: 40  $\mu\text{m}$

517 H. Volcano plots of RNA-seq data showing genes enriched in *y334-Gal4* [H] and *y405-Gal4* [I]  
518 relative to a pan-neuronal reference. Labeled genes (red) show  $\log_2$  fold changes  $> 8$  and FDR-  
519 corrected p-values  $< 0.05$ . Dashed red line shows threshold of Benjamini-Hochberg corrected  
520 5% false discovery rate.

521

522 Figure 6: GABAergic signaling from Purkinje cells to vPPNs regulates arrest onset

523 A Dorsal (Left) and lateral (Right) views of maximum projections of Purkinje cells (PC) labeled by  
524 *aldoca-Gal4;UAS:eGFP-CAAX* (cyan) and *y334-Gal4* vPPNs (outlined with dashed white line)  
525 following co-registration. White arrows show projections from PCs toward vPPNs and yellow  
526 arrows show hindbrain projections. R = Rostral, M = Medial, V = Ventral. Inset shows imaging  
527 window. Scale bar: 50  $\mu\text{m}$

528 B Dorsal (Left) and lateral (Right) views of maximum projections of *y405-Gal4* vPPNs colabeled  
529 with UAS:kaede (red) and UAS:gphn-FingR-mCherry (cyan). R = Rostral, L = Lateral, D =  
530 Dorsal. Inset shows imaging window. Scale bar: 20  $\mu\text{m}$

531 C (Top) Schematic diagram of experimental protocol for ethanol exposure experiment showing  
532 timepoints for testing ethanol exposed fish (red) and washout experiment (blue). (Bottom left)  
533 Behavioral arrest in control (grey, n = 18 fish) and 300 mM ethanol exposed (red, n = 18 fish)  
534 shown as change in speed following vibrational stimuli. Two sample t-test,  $p < 0.001$ . (Bottom

- 535 right) Behavioral arrest in control (grey, n = 18 fish) and ethanol washout (blue, n = 18 fish)  
536 shown as change in speed following vibrational stimuli. Two sample t-test,  $p = 0.72$ .
- 537 D Change in behavioral arrest after bath application of GABA at concentrations of 25  $\mu\text{M}$  (pink, n =  
538 27 fish), 50  $\mu\text{M}$  (red, n = 27), and 100  $\mu\text{M}$  (dark red, n = 27) compared to control (grey, n = 27).  
539 Top row shows raw change in speed and bottom row shows 95% CI of mean differences relative  
540 to control. ANOVA,  $p = 0.01$ .
- 541 E Schematic representation of the GABA<sub>A</sub> receptor complex with the intracellular loop of the  $\gamma$   
542 subunit (ICL). UAS:ICL-GFP expression suppresses GABA<sub>A</sub> signaling and the mutant form of  
543 ICL (UAS:ICLmut-GFP) does not affect GABA<sub>A</sub> signaling.
- 544 F Changes in vibration-evoked arrest in *y334-Gal4* fish (Left) expressing UAS:ICL-GFP (grey =  
545 injected controls, n = 61; red = ICL-expressing, n = 47; two-sample t-test,  $p = 0.007$ ) and (Right)  
546 expressing UAS:ICLmut-GFP (grey = injected controls, n = 42; red = ICLmut-expressing, n = 40;  
547 two-sample t-test,  $p = 0.91$ ).

548

549 Figure 7: vPPN activation is associated with inescapable flow stimulation and drives arrest

- 550 A (Top) Single plane dorsal view of registered, averaged pERK/tERK ratios in control (n = 12 fish)  
551 (Left) and vibratory-stimulus exposed fish (n = 12) (Right). Color shows p/tERK ratio (AU).  
552 (Bottom) Magnified region around right vPPN showing greater activation in post-stimulus  
553 condition compared to control. Scale bar: 30  $\mu\text{m}$
- 554 B pERK/tERK ratios in vPPN masked regions for control (grey, n = 12 fish) and vibration stimulus  
555 exposed (red, n = 12 fish) conditions. ANOVA  $F_{1,22} = 92.98$ ,  $p < 0.001$ .
- 556 C Schematic of apparatus used to deliver water flow stimuli to head-fixed zebrafish for calcium  
557 imaging.
- 558 D (Top) Calcium traces for flow-responsive (n = 41 cells from 14 fish) and non-responsive (n = 379  
559 cells) neurons showing GCaMP6s fluorescence normalized to nuclear-localized RFP ( $\Delta R/R$ ).

560 Vertical dashed line shows flow stimulation period. (Bottom) Average ( $\pm$  SEM) normalized  
561 GCaMP6s fluorescence for responsive (red) and non-responsive (black) neurons.  
562 E Position of flow-responsive (red) and non-responsive (grey) neurons within the vPPN. R =  
563 Rostral, M = Medial.  
564 F (Top) Schematic diagram of photostimulation protocol with 60 Hz 2 W/cm<sup>2</sup> stimulus. (Bottom)  
565 Behavioral arrest represented as speed (relative to baseline) in injected controls (grey, n = 23 fish)  
566 and *y334-Gal4*;UAS:CoChR (red, n = 22 fish) following photostimulation. ANOVA  $F_{1,45} =$   
567 8.196,  $p = 0.006$ .

568

569 Figure 8: vPPN neurons project bilaterally to RoL1 reticulospinal neurons and disrupt their activity to  
570 evoke arrest

571 A Diagram of Gal4/UAS and B3 recombinase intersectional approach used for single neuron  
572 tracing. Heat shock activates B3 recombinase and facilitates sparse labeling of single neurons  
573 with membrane-tagged RFP (lynTagRFP)

574 B Dorsal (Left) and lateral (Right) views of maximum projection of single neuron traces from *y334-*  
575 *Gal4* vPPNs in a 3D model of zebrafish brain with a model of RoL1 reticulospinal neurons  
576 (green). Spheres denote cell body location. Representative examples of vPPNs projecting to  
577 ipsilateral (black), contralateral (red) and hypothalamic (blue) targets are shown (Arrow shows  
578 terminal projection in rostral hypothalamus. All neurons can be viewed in Figure S6. Inset shows  
579 viewing window. Scale bar: 50  $\mu$ m. R = Rostral, L = Lateral, V = Ventral. H = Hypothalamus,  
580 OT = Optic Tectum, Cb = Cerebellum

581 C (Top) Maximum projection of *y334-Gal4*;UAS:synaptophysin-RFP (green) and backfilled RoL1  
582 (magenta) colocalization in Dorsal (Left) and Lateral (Right) views. White arrow shows example  
583 of apposition of *y334-Gal4* synapses with RoL1 cell body. Inset: imaging window. Scale bar: 10  
584  $\mu$ m. (Bottom) 3D rendering of lateral view showing synapses relative to RoL1 and surrounding  
585 neuropil. R = Rostral, L = Lateral, D = Dorsal



- 586 D (Top) Representative examples of backfilled sham ablated (Left) and multiphoton ablated (Right)  
587 RoL1 reticulospinal neurons. (Bottom) Representative baseline movement traces for sham ablated  
588 (Left) and RoL1 ablated (Right) fish. Color represents speed within a 5 sec epoch. Scale bar: 1  
589 cm.
- 590 E Behavioral arrest measured as change in speed (mm/s) for sham ablated (grey, n = 11 fish) and  
591 bilateral RoL1 ablated (red, n = 8 fish). ANOVA  $F_{1,17} = 14.63$ ,  $p = 0.001$ .
- 592 F Turn initiation (Left) and forward swim initiation (Right) measured from high-speed video  
593 recordings during baseline locomotion in sham ablated (grey, n = 14) and RoL1 ablated (red, n =  
594 12). Turn initiation is specifically suppressed in RoL1 ablated fish. ANOVA  $F_{1,25} = 5.49$ ,  $p =$   
595 0.03.

596

597 Figure 9: Circuit model for tonic immobility

- 598 A Representation of the defense cascade showing changes in activity as a function of perceived  
599 threat. The terminal behavior in the defense cascade is tonic immobility, which presents as  
600 behavioral arrest (reduced movement compared to baseline)
- 601 B Repeated, inescapable stimuli activate peripheral auditory (SAG) and lateral line ganglia which  
602 then excite the granule cells of the cerebellum (green lines). During stimulus presentation, the  
603 cerebellum sends inhibitory projections to the prepontine neurons (PPNs). Following sustained  
604 vibratory stimulation, cerebellar inhibition ceases and leads to activation of the PPNs. Bilateral  
605 activation of the PPNs disrupts RoL1 neuron activity, leading to suppressed turning behavior and  
606 immobility.

607

608

609

610

611 Supporting information

612 Figure S1

613 A Averaged locomotion represented as speed (relative to the average baseline speed) and group-  
614 level responses to repeated 26 dB re. 1 m/s<sup>2</sup> stimuli (n = 27 fish). Shaded area for each trace is  
615 SEM. Speed decrease and recovery time are consistent with multiple stimulus presentations.

616 B Histogram of path vector angles during baseline (grey) and post-stimulus (red) condition. Inset:  
617 schematic diagram showing how path vector angles are calculated.

618 C Changes in electric field pulse evoked startle response (EFP SLC, n = 27 fish) during baseline,  
619 arrest, and recovery periods (Mean ± SEM).

620 Figure S2

621 A. Kinematic analysis for short-latency startle (SLC) responses during baseline (red) and arrest  
622 (blue). No differences are observed between baseline and arrest for response latency, initial bend  
623 angle, counterbend angle, and displacement from each bout. Data points represent averaged data  
624 from each fish tested (n = 27).

625 B. Kinematic analysis of latency, initial bend angle, counterbend angle, and displacement for dark  
626 flash O-bend responses during baseline (red) and arrest (blue).

627 Figure S3

628 A. Histogram of changes in stimulus evoked behavioral arrest for lines used in the circuit breaking  
629 screen. Data are plotted as Cohen's d of differences between control and ablated fish. Gal4  
630 ablations with high effect sizes (d > 0.6) are shown in red.

631 B. Averaged speed (mm/s) during the pre-stimulus baseline for control fish (grey), *y318-Gal4*, *y334-*  
632 *Gal4*, and *y405-Gal4*. Whiskers show 95% CI. Baseline locomotion in *y405-Gal4* ablated fish is  
633 significantly reduced compared to control (p = 1.2 × 10<sup>-14</sup>, two-sample t-test)

634 C. Time to half-recovery (defined as the time required to recover to 50% of pre-stimulus baseline  
635 speed) in *y318-Gal4* ablated, *y334-Gal4* ablated, and *y405-Gal4* ablated fish. Differences  
636 between control (grey) and ablated (red) fish are not statistically significant in all three ablation  
637 conditions.

638 Figure S4

639 A. Schematic diagram of electrical field pulse [Top] and behavioral arena [Bottom] used for electric  
640 shock induced behavioral arrest. Groups of  $n = 5$  fish were exposed to 2 V/cm pulsed stimuli for  
641 30 s and total displacement was measured.

642 B. Traces showing speed (relative to the average baseline speed) for control (black) and *y334-Gal4*  
643 ablated (red) fish. Shaded area represents SEM.

644 Figure S5

645 A. Example of *y256-Gal4* statoacoustic ganglion (SAG) ablation using NTR. Control (Left) and  
646 NTR ablated (Right) fish were imaged at 7 dpf after behavioral testing and registered to a  
647 reference brain. Ablated fish showed a total loss of SAG neurons.

648 B. Example of lateral line ablation using 250  $\mu$ M neomycin (Neo). DASPEI labeled neuromasts are  
649 visible in control (Top) and absent in Neo treated fish. Arrowheads show DASPEI labeling of the  
650 olfactory epithelium which is not affected by neomycin treatment.

651 Figure S6

652 3D reconstructions of all traced ventral prepontine neurons from *y334-Gal4* in a model of the  
653 larval zebrafish brain (blue) with a model of RoL1 reticulospinal neurons (green). Representative  
654 examples of ipsilateral projecting ( $n = 7$  neurons), contralateral projecting ( $n = 5$ ), and  
655 hypothalamus projecting ( $n = 2$ ) neurons can be seen in Figure 8B.

656 Figure S7

657 Flow-responsive vPPN responses to repeated stimuli (Average  $\pm$  SEM, n = 22 cells). First  
658 stimulus presentation (Trial 1, green) and second presentation (Trial 2, purple) are strongly  
659 correlated in time and response magnitude (Pearson correlation = 0.71).

660 Figure S8

661 Average swim speed during the baseline period (mm/s) in RoL1 ablated neurons (red) compared  
662 to sham ablated controls (grey).

663

664

665

666

667

668

669

670

671

672

673

674

675

676

## 677 **Methods**

### 678 *Zebrafish lines*

679 All lines used in this study were maintained in a Tupfel Longfin (TL) background. Generation and  
680 description of the Gal4 lines used in this study (*y256-Gal4*, *y318-Gal4*, *y334-Gal4*, *y397-Gal4*, *y405-*  
681 *Gal4*) has been reported previously (Marquart et al. 2015). In addition, we received *aldoca:GFF (aldoca-*  
682 *Gal4)*(Takeuchi et al. 2015) as a kind gift from Masahiko Hibi (Nagoya University). Unless mentioned  
683 specifically, all Gal4 lines were maintained with and imaged with *Tg(UAS:kaede)s1999t* (Davison et al.,  
684 2007). Nitroreductase lines *Tg(UAS-E1b:BGi-epNTR-TagRFPT-oPre)y268Tg* (UAS:epNTR) and  
685 *Tg(UAS:epNTR-TagRFPT-utr.zb3)y362Tg* were used for genetic ablation experiments. Gal4-Cre  
686 intersectional ablations were conducted using *Et(REx2-SCP1:BGi-Cre-2a-Cer)y520*(Tabor et al., 2019).  
687 Other UAS lines used in this study were *Tg(UAS:EGFP-CAAX)m1230* (Fernandes et al., 2012),  
688 *Tg(14xUAS-E1b:BGi-nls-GCaMP6s.zf1-2a-nls-dsRed2.zf1)y510* (Tabor et al., 2018),  
689 *UAS:lynTagRFPT(y260)* (Yokogawa et al. 2012), *Tg(UAS-E1b:BGi-SCN5a-v2a-TagRFPT)y266* (Tabor  
690 et al. 2014), and *cUAS:PSD95.FingR-GPF-ZFC(CCR5TC)-KRAB(A)* (Son et al. 2016).

691 Transgenic lines used for imaging neurotransmitter identity identification were

692 *TgBAC(slc17a6b[vglut2a]:loxP-DsRed-loxP-GFP)nns14*, *TgBAC(gad1b:LOXP-RFP-LOXP-GFP)nns26*  
693 (Satou et al., 2013), *vachta:GFP* (a kind gift from Minoru Koyama, University of Toronto),  
694 *Tg(neurod1:nsfa-EGFP)vo4Tg* (a kind gift from Katie Drerup, University of Wisconsin)(Mo and  
695 Nicolson, 2011).

696 The pTol1-UAS:CoChR-tdTomato (Antinucci et al., 2020) plasmid used for photoactivation experiments  
697 was a kind gift from Claire Wyart, ICM. The intracellular loop (ICL) and mutant ICL (ICLmut)  
698 constructs were generated by inserting a zebrafish codon-optimized geneblock (IDT; sequence from  
699 (Shen et al., 2009)) into UAS:*dusp27-GFP* (Fero et al., 2014) by replacing *dusp27* with ICL using  
700 restriction enzyme digestion and ligation. Plasmids were injected with *tol1* transposase and screened for  
701 fluorescence before testing.

702 *Behavioral experiments*

703 All behavioral experiments were conducted at 27-28 °C. For initial behavioral arrest characterization,  
704 zebrafish larvae (6-7 dpf) were placed individually in 1 cm<sup>2</sup> wells of a 3x3 arena and allowed to acclimate  
705 to ambient light for > 2 min. The arena was lit from below with a white-spectrum LED array; for  
706 experiments conducted in dark, an infrared LED was used. Sinusoidal stimuli were generated using a  
707 BNC-2110 DAQ board (National Instruments) and delivered using a Type 3810 minishaker (Bruel-  
708 Kjaer). Vibratory stimuli were calibrated so that single stimuli evoked escape responses with 83% ± 5%  
709 SEM (n = 8 fish). Behavioral responses were captured at 20 frames/sec using a µEye camera (IDS  
710 Imaging) fitted with a 40 mm macro lens (EX DG Macro, Sigma). Each trial contained a 120 sec baseline  
711 period followed by ~15 sec vibratory stimulation and a 210 sec recovery period. Fish were imaged during  
712 the baseline and recovery period, but not during stimulation. Behavioral responses were analyzed using  
713 FLOTE software (Burgess and Granato, 2007a). Locomotion was measured as the total (x,y) distance  
714 moved within 5 sec bins and fish that displayed an average speed of < 0.5 mm/sec during the baseline  
715 period were excluded from analysis. Immobility was defined as the change in speed between baseline and  
716 the first epoch of the post-stimulus condition. This estimate of immobility is conservative because it  
717 samples a 5 sec cumulative window and because of inherent tracking variability due to instrumental noise.  
718 In cases where baseline locomotion was affected by experimental manipulation, we compared immobility  
719 in fish with baseline locomotion between 2-3 mm/s in both conditions.

720 Time-constant to half recovery ( $\Delta T$ ) was calculated as the time to recover to half of the baseline.

721 Individuals that never recovered to half of the baseline were coded as having recovery times of 210 sec.

722 Locomotor path analysis was conducted with locomotion data sampled at 20 Hz. After smoothing  
723 position data using a moving average, we calculated the vector angle between consecutive points using

724 the formula  $\theta = \tan^{-1} \left( \frac{y}{x} \right)$ .

725 Locomotor behaviors and escape responses were imaged using the same apparatus. Responses were  
726 recorded at 1000 frames/sec using a DRS Lightning high speed camera (DEL Imaging) and analyzed

727 using FLOTE software. Locomotor kinematics were measured in 400 ms epochs and categorized as turns  
728 or forward bouts using kinematic parameters described previously (Burgess and Granato, 2007b). Turn or  
729 forward bout initiation was calculated as the percent of epochs in which that bout was performed. For all  
730 epochs, only the first behavior was used for analysis.

731 Righting reflex was tested using the same apparatus used for high-speed video tracking. Groups of 5 fish  
732 were placed in a 5 cm x 5 cm arena and presented with a 15 s low frequency stimulus; control fish were  
733 not stimulated. After stimulus presentation, all fish were presented with a 1 s high amplitude, low  
734 frequency stimulus to disrupt balance. Groups of fish were tracked at 1000 frames/s for 15 sec and  
735 blinded for analysis. Righting was annotated manually by a naive observer who recorded the proportion  
736 unbalanced fish at the end of 500 ms epochs. ‘Time to balanced’ was defined as the time at which all fish  
737 in the arena showed a dorsal-up posture.

738 Acoustic and electric field evoked startle escape response experiments were conducted using previously  
739 published protocols (Tabor et al., 2014). Acoustic or electric pulse stimuli were delivered at 30 sec  
740 intervals to minimize habituation and categorized as short-latency or long-latency startle responses using  
741 kinematic and response latency parameters. Responsiveness was calculated as the percent of responses in  
742 each condition (baseline, SEBA, Recovery). Visual escapes using dark flash stimuli were performed using  
743 parameters published previously (Burgess & Granato 2007a). Larvae were illuminated from above with  
744 white-spectrum light for the duration of the experiment. Dark flash stimuli consisted of a total loss of  
745 illumination for 300 ms and were delivered at 60 sec intervals. Responses were characterized using  
746 kinematic parameters and responsiveness was calculated in the same manner as the SLC experiments.

#### 747 *Ablations*

748 Genetic ablations were conducted according to previously published protocols (Marquart et al., 2015;  
749 Tabor et al., 2018). Gal4 lines were chosen for the circuit breaking screen using the zebrafish brain  
750 browser (zbbrowser.com) and crossed to UAS:epNTR embryos and screened for TagRFP fluorescence at  
751 3-4 dpf. In Gal4-Cre experiments, fish were screened for the presence of RFP in the presumed intersect.

752 Non-fluorescent sibling embryos were used as controls in both cases. Both groups were treated with 10  
753 mM metronidazole (Sigma) in the absence of light for 24-48 hrs. Following ablation, larvae were washed  
754 in E3 and allowed to recover for >12 hrs before experimentation. Following behavioral experiments, a  
755 subset of ablated fish was imaged using epifluorescent microscopy to confirm full pattern ablation.

756 Neuromast ablations were conducted using 200  $\mu$ M neomycin in E2 embryo medium according to (Harris  
757 et al., 2003). 6 dpf larvae were immersed in neomycin for 1 hr, rinsed four times in fresh E2 and allowed  
758 to recover for 3-6 hrs in E2 before testing. Following testing, ablation efficiency was confirmed using the  
759 fluorescent dye 2-4-(dimethylamino)styryl-N-ethylpyridinium-iodide (DASPEI)(Sigma). Larvae were  
760 immersed in 0.005% DASPEI in E3 for 15 min, then rinsed twice in E3. Larvae were imaged using  
761 epifluorescent microscopy with a 488 nm laser to confirm ablation. Fluorescence in the olfactory  
762 epithelium was used as a positive control of DASPEI labeling.

763 Multiphoton laser ablations were conducted on 4 dpf larvae raised in 300  $\mu$ M N-Phenylthiourea (PTU) in  
764 E3 to suppress melanin formation. PTU was added ~24 hpf and changed every 48 hrs. Larvae were sorted  
765 for UAS:kaede expression at 3 dpf. Larvae were anesthetized in MS222 and mounted in 2.5% low  
766 melting point agarose. Ablations were performed on a Leica TCS SPII upright confocal microscope with  
767 a MaiTai DeepSee multiphoton laser (Spectraphysics) using a 20x/1.00 NA water immersion lens. Single  
768 cells within the Gal4 pattern were identified visually using a 488 nm laser and ablated using a pulsed 800-  
769 850 nm tuned multiphoton beam. Ablations were confirmed visually using the 488 nm laser and  
770 transmitted light. Sham ablation animals were mounted in the same manner but were exposed to low laser  
771 intensity. Ablated and sham control larvae were raised in E3 until behavioral testing at 6 dpf and laser  
772 ablations were confirmed by confocal microscopy.

### 773 *Drug exposure experiments*

774 Ethanol and GABA exposure experiments were conducted on 6 dpf fish as described above. Stock  
775 solutions of 1 mM GABA and 50% ethanol were diluted in E3 to the working concentration. Fish were  
776 immersed for 20 min in solution immediately before the experiments and controls were placed in an equal



777 volume of E3. In the ethanol experiment, fish were immersed in 300 mM ethanol for 20 min and fish  
778 designated for the washout experiment (n=27 fish) were rinsed twice in E3 and placed into fresh E3 for an  
779 additional 20 min before testing.

#### 780 *Cell capture and RNA sequencing*

781 Cells from *y334-Gal4;UAS:kaede* and *y405-Gal4;UAS:kaede* were collected using a modified protocol  
782 from (Hempel et al., 2007). Prepontine regions from 5-6 dpf fish were dissected into Evans buffer and  
783 dissociated in 1 mg/ml neutral protease (Worthington) in Evans buffer for 30 min at room temperature  
784 with gentle shaking. The tissue fragments were rinsed 3 times with Evans buffer and triturated, and  
785 dissociated cell suspensions were plated onto a Sylgard-coated Petri dish. Kaede-expressing cells were  
786 aspirated into a glass micropipette under a fluorescent microscope. Collected cells were visually verified  
787 by plating into a fresh dish the process was repeated until pure samples of kaede-expressing cells were  
788 obtained. Groups of 6-10 cells were dispensed from the micropipette into 1  $\mu$ l ice-cold 10x reaction buffer  
789 (SMART-Seq v4 kit, Takara) and flash-frozen before library preparation. Control samples were 50-100  
790 non-prepontine cells. cDNA synthesis was performed using the SMART-Seq v4 kit according to the  
791 manufacturer's instructions. After cDNA purification (Beckman SPRI beads), quality control (Agilent  
792 Bioanalyzer), and quantification, samples were sequenced on an Illumina Novaseq with paired end reads.  
793 Raw read counts were co-normalized and genes with expression >1000 reads and <10 reads in control  
794 samples were filtered to remove highly expressed genes. Differential expression was calculated using  
795 Wilcoxon Rank-Sum tests and p-values were corrected for multiple comparisons using a Benjamini-  
796 Hochberg correction with a 5% FDR.

#### 797 *Optogenetic activation experiments*

798 Gal4 embryos were injected at the one cell stage with a plasmid containing UAS:CoChR with toll mRNA  
799 and raised in E3 under low light conditions to reduce blue light exposure. Larvae were screened for RFP  
800 fluorescence at 3 dpf and injected embryos without RFP expression were used as controls. Behavioral  
801 experiments were conducted on the same apparatus as the vibration experiments with a 470 nm LED

802 (Prizmatix) replacing the minishaker. Experiments were done with IR illumination in darkness. Following  
803 a 10 min acclimation period, larvae were presented with a 15 sec 60 Hz pulsed stimulus to approximate  
804 the vibratory stimulus and behavior was captured and analyzed as described earlier.

### 805 *Imaging*

806 Larvae were raised in 300  $\mu$ M PTU beginning at 24 hpf. For whole brain images, 5 dpf larvae were  
807 immersed in a solution of 0.001% Lysotracker DeepRed (Invitrogen) in 1% DMSO in E3 for 12-18 hours,  
808 then rinsed in E3 twice before imaging. At 6 dpf, larvae were anesthetized in MS222 and dorsally  
809 mounted in 2.5% low melting point agarose within Lab-Tek II #1.5 cell culture chambers. In some cases,  
810 larvae expressing UAS:kaede were photoconverted using 405 nm light for 10 min before imaging. Whole  
811 and partial brain images were acquired on a Leica SPII inverted confocal microscope with a 25x/0.95 NA  
812 water immersion lens. Unless specified otherwise, images were acquired at 1  $\mu$ m x 1  $\mu$ m x 2  $\mu$ m voxel  
813 resolution. Samples were excited using a 488 nm argon laser and a 561 nm solid state laser and detected  
814 using hybrid detectors for GFP and RFP channels and a PMT detector for far red fluorescence. Images  
815 were post-processed for dye separation using Leica Application Suite software. 3D rendering of imaged  
816 fish was conducted in Imaris 8.4.2 (Bitplane).

817 Individual neurons were labeled by crossing *y334-Gal4;UAS:blowitch* fish to *hsp70:B3* and raised in  
818 300  $\mu$ M PTU. Individual neurons were labeled at 3 dpf by a 20 min heat shock at 35 °C to activate B3  
819 recombinase. Larvae were imaged at 6 dpf and axon projections were traced semi-automatically in Imaris  
820 using the filaments feature.

821 Whole brain images were acquired using 616 x 500 pixel tiles with 25  $\mu$ m overlap and stitched post-hoc  
822 using custom Fiji scripts. Images were registered using previously published protocols (Marquart et al.  
823 2015, Tabor et al. 2018). Stitched image stacks were split into individual channels and registered to a  
824 reference brain using ANTs and custom parameters. Registered images were masked with a custom mask  
825 that removed autofluorescence from skin and the eyes.

826 pERK/tERK labeling was conducted similar to previously published protocols (Randlett et al., 2015).  
827 Briefly, TL fish were raised in 300  $\mu$ M PTU until 6 dpf. Fish were presented with arrest-inducing stimuli  
828 and fixed in 4% paraformaldehyde 2-5 min after stimulus presentation. Control fish were exposed to the  
829 vibratory stimulus, but fixed >10 min after stimulus presentation. Fixed fish were immunofluorescently  
830 labeled pERK (Phospho-pp44/42 MAP Kinase) and tERK (pp44/42 MAP Kinase) antibodies (Cell  
831 Signaling Technologies) and Alexa fluorophore conjugated secondary antibodies at 1:500 dilutions. After  
832 registration, images were masked using a vPPN mask generated from a binarized *y334-Gal4* pattern from  
833 the Zebrafish Brain Browser (zbbrowser.com). pERK/tERK ratios were calculated and averaged within  
834 the masked area for each imaged fish.

835 Visualization of reticulospinal neurons was conducted by backfills of *y405-Gal4* and *y334-Gal4* with  
836 UAS:kaede, UAS:LynTagRFP or UAS:caax-EGFP raised in PTU. 5 dpf larvae were anesthetized in  
837 MS222 and placed into a Sylgard coated dish. A ~50% solution of either 3000 MW  
838 Tetramethylrhodamine biotinylated dextran or 10000 MW Alexa-488 conjugated dextran (Molecular  
839 Probes) was injected into the spinal cord immediately dorsal to the swim bladder using a PV820  
840 pneumatic picospritzer (World Precision Instruments). Larvae were allowed to recover in Evans buffer  
841 (134 mM NaCl, 2.9 mM KCl, 2.1 mM CaCl<sub>2</sub>, 1.2 mM MgCl<sub>2</sub>, 10 mM glucose, 10 mM HEPES, pH 7.5  
842 with NaOH) (Drapeau et al., 1999) for 24 hours and imaged as described above.

#### 843 *Calcium imaging*

844 Calcium imaging was performed on fish injected with *tol1* mRNA and UAS:nls-GCamp6s-2a-nls-dsRed  
845 at the single cell stage. Larvae were raised in 300  $\mu$ M PTU and screened for dsRed fluorescence at 3 dpf.  
846 At 6 dpf, larvae were mounted in 2.5% low melting point agarose in a 35 mm<sup>2</sup> petri dish. The agarose  
847 surrounding the tail was cut out to allow access to water flow. Mounted larvae were placed in a custom  
848 3D printed stage on a Leica SPII upright confocal microscope with a resonance scanner and a 20x/1.00  
849 NA water dipping lens. Pulsed flow stimuli were delivered using a Cole-Parmer self-priming micropump  
850 controlled by a BNC-2110 DAQ board. Each stimulus set consisted of a 10 sec baseline period followed  
851 by 5 second stimulus presentation of 1 Hz water pulses and a 45 sec recovery period. In experiments with

852 multiple stimulus presentations, stimulus sets were separated by > 120 seconds to minimize effects of  
853 consecutive stimuli. GCamp6s activity was recorded using 488 nm and 561 nm excitation at 2 Hz in  
854 single planes, which were chosen by visual approximation of the vPPN pattern. GCamp6s fluorescence  
855 was measured from image time series using custom Python scripts and the scikit-image toolbox. Nuclei  
856 position was identified from the dsRed channel using the Laplacian of Gaussian method of blob detection  
857 and was confirmed visually. Nuclear position was then registered using manual affine registration using  
858 the first 10 frames of the dsRed channel as a reference. Total fluorescence of a bounding box surrounding  
859 the detected nucleus was measured in the dsRed and GCamp6s channels and  $\Delta R/R$  was normalized by  
860 dividing GCamp6s fluorescence by dsRed fluorescence. The normalized fluorescence was divided by the  
861 average baseline normalized fluorescence to obtain a final measure of fluorescence. Trials where cells  
862 drifted out of the z-plane or where the animal exhibited struggle behavior were discarded. Cells that  
863 increased fluorescence by > 3 standard deviations above the mean during the stimulus period were  
864 characterized as stimulus-responsive cells.

#### 865 *Statistics*

866 All data was analyzed using custom scripts in IDL (Harris Geospatial), R (<http://www.R-project.org>), and  
867 Python 3.7. All tests are two-tailed and assumed independent samples unless noted.

868

869

870

871

872

873

874

875 **References**

- 876 Agetsuma, M., Aizawa, H., Aoki, T., Nakayama, R., Takahoko, M., Goto, M., Sassa, T., Amo, R.,  
877 Shiraki, T., Kawakami, K., et al. (2010). The habenula is crucial for experience-dependent modification  
878 of fear responses in zebrafish. *Nat. Neurosci.* *13*, 1354–1356.
- 879 Aizenman, C.D., and Linden, D.J. (1999). Regulation of the rebound depolarization and spontaneous  
880 firing patterns of deep nuclear neurons in slices of rat cerebellum. *J. Neurophysiol.* *82*, 1697–1709.
- 881 Alderman, S.L., and Bernier, N.J. (2009). Ontogeny of the corticotropin-releasing factor system in  
882 zebrafish. *Gen. Comp. Endocrinol.* *164*, 61–69.
- 883 Anderson, D.J., and Adolphs, R. (2014). A framework for studying emotions across species. *Cell* *157*,  
884 187–200.
- 885 Antinucci, P., Dumitrescu, A., Deleuze, C., Morley, H.J., Leung, K., Hagley, T., Kubo, F., Baier, H.,  
886 Bianco, I.H., and Wyart, C. (2020). A calibrated optogenetic toolbox of stable zebrafish opsin lines. *Elife*  
887 *9*.
- 888 Assad, N., Luz, W.L., Santos-Silva, M., Carvalho, T., Moraes, S., Picanço-Diniz, D.L.W., Bahia, C.P.,  
889 Oliveira Batista, E. de J., da Conceição Passos, A., Oliveira, K.R.H.M., et al. (2020). Acute Restraint  
890 Stress Evokes Anxiety-Like Behavior Mediated by Telencephalic Inactivation and GabAergic  
891 Dysfunction in Zebrafish Brains. *Sci. Rep.* *10*, 5551.
- 892 Bae, Y.-K., Kani, S., Shimizu, T., Tanabe, K., Nojima, H., Kimura, Y., Higashijima, S.-I., and Hibi, M.  
893 (2009). Anatomy of zebrafish cerebellum and screen for mutations affecting its development. *Dev. Biol.*  
894 *330*, 406–426.
- 895 Bagnall, M.W., and McLean, D.L. (2014). Modular organization of axial microcircuits in zebrafish.  
896 *Science* *343*, 197–200.
- 897 Barik, A., Thompson, J.H., Seltzer, M., Ghitani, N., and Chesler, A.T. (2018). A Brainstem-Spinal Circuit  
898 Controlling Nocifensive Behavior. *Neuron* *100*, 1491-1503.e3.
- 899 Barrios, J.P., Wang, W.-C., England, R., Reifenberg, E., and Douglass, A.D. (2020). Hypothalamic  
900 dopamine neurons control sensorimotor behavior by modulating brainstem premotor nuclei.
- 901 Bergeron, S.A., Hannan, M.C., Codore, H., Fero, K., Li, G.H., Moak, Z., Yokogawa, T., and Burgess,  
902 H.A. (2012). Brain selective transgene expression in zebrafish using an NRSE derived motif. *Front.*  
903 *Neural Circuits* *6*, 110.
- 904 Bergeron, S.A., Carrier, N., Li, G.H., Ahn, S., and Burgess, H.A. (2015). Gsx1 expression defines  
905 neurons required for prepulse inhibition. *Mol. Psychiatry* *20*, 974–985.
- 906 Bowen, A.J., Chen, J.Y., Huang, Y.W., Baertsch, N.A., Park, S., and Palmiter, R.D. (2020). Dissociable  
907 control of unconditioned responses and associative fear learning by parabrachial CGRP neurons. *Elife* *9*.
- 908 Burgess, H.A., and Granato, M. (2007a). Modulation of locomotor activity in larval zebrafish during light  
909 adaptation. *J. Exp. Biol.* *210*, 2526–2539.
- 910 Burgess, H.A., and Granato, M. (2007b). Sensorimotor gating in larval zebrafish. *J. Neurosci.* *27*, 4984–  
911 4994.

- 912 Cachat, J., Stewart, A., Grossman, L., Gaikwad, S., Kadri, F., Chung, K.M., Wu, N., Wong, K., Roy, S.,  
913 Suci, C., et al. (2010). Measuring behavioral and endocrine responses to novelty stress in adult zebrafish.  
914 *Nat. Protoc.* 5, 1786–1799.
- 915 Carli, G. (1968). Depression of somatic reflexes during rabbit hypnosis. *Brain Res.* 11, 453–456.
- 916 Chandrasekar, G., Lauter, G., and Hauptmann, G. (2007). Distribution of corticotropin-releasing hormone  
917 in the developing zebrafish brain. *J. Comp. Neurol.* 505, 337–351.
- 918 Chiang, M.C., Bowen, A., Schier, L.A., Tupone, D., Uddin, O., and Heinricher, M.M. (2019).  
919 Parabrachial Complex: A Hub for Pain and Aversion. *J. Neurosci.* 39, 8225–8230.
- 920 Crawford, F.T. (1977). Induction and Duration of Tonic Immobility. *Psychol. Rec.* 27, 89–107.
- 921 Dai, Y., Iwata, K., Fukuoka, T., Kondo, E., Tokunaga, A., Yamanaka, H., Tachibana, T., Liu, Y., and  
922 Noguchi, K. (2002). Phosphorylation of extracellular signal-regulated kinase in primary afferent neurons  
923 by noxious stimuli and its involvement in peripheral sensitization. *J. Neurosci.* 22, 7737–7745.
- 924 Davison, J.M., Akitake, C.M., Goll, M.G., Rhee, J.M., Gosse, N., Baier, H., Halpern, M.E., Leach, S.D.,  
925 and Parsons, M.J. (2007). Transactivation from Gal4-VP16 transgenic insertions for tissue-specific cell  
926 labeling and ablation in zebrafish. *Dev. Biol.* 304, 811–824.
- 927 Dean, P., Redgrave, P., and Westby, G.W. (1989). Event or emergency? Two response systems in the  
928 mammalian superior colliculus. *Trends Neurosci.* 12, 137–147.
- 929 Dohaku, R., Yamaguchi, M., Yamamoto, N., Shimizu, T., Osakada, F., and Hibi, M. (2019). Tracing of  
930 Afferent Connections in the Zebrafish Cerebellum Using Recombinant Rabies Virus. *Front. Neural*  
931 *Circuits* 13, 30.
- 932 Drapeau, P., Ali, D.W., Buss, R.R., and Saint-Amant, L. (1999). In vivo recording from identifiable  
933 neurons of the locomotor network in the developing zebrafish. *J. Neurosci. Methods* 88, 1–13.
- 934 Duboué, E.R., Hong, E., Eldred, K.C., and Halpern, M.E. (2017). Left Habenular Activity Attenuates  
935 Fear Responses in Larval Zebrafish. *Curr. Biol.* 27, 2154–2162.e3.
- 936 Edson, P.H., and Gallup, G.G. (1972). Tonic immobility as a fear response in lizards *Anolis carolinensis*.  
937 *Psychon. Sci.* 26, 27–28.
- 938 Ekker, M., Wegner, J., Akimenko, M.A., and Westerfield, M. (1992). Coordinate embryonic expression  
939 of three zebrafish engrailed genes. *Development* 116, 1001–1010.
- 940 Esposito, G., Yoshida, S., Ohnishi, R., Tsuneoka, Y., Rostagno, M.D.C., Yokota, S., Okabe, S., Kamiya,  
941 K., Hoshino, M., Shimizu, M., et al. (2013). Infant calming responses during maternal carrying in humans  
942 and mice. *Curr. Biol.* 23, 739–745.
- 943 Fanselow, M.S. (1994). Neural organization of the defensive behavior system responsible for fear.  
944 *Psychon. Bull. Rev.* 1, 429–438.
- 945 Favre-Bulle, I.A., Stilgoe, A.B., Rubinsztein-Dunlop, H., and Scott, E.K. (2017). Optical trapping of  
946 otoliths drives vestibular behaviours in larval zebrafish. *Nat. Commun.* 8, 630.
- 947 Fernandes, A.M., Fero, K., Arrenberg, A.B., Bergeron, S.A., Driever, W., and Burgess, H.A. (2012).  
948 Deep brain photoreceptors control light-seeking behavior in zebrafish larvae. *Curr. Biol.* 22, 2042–2047.

- 949 Fero, K., Yokogawa, T., and Burgess, H.A. (2011). The Behavioral Repertoire of Larval Zebrafish. In  
950 Zebrafish Models in Neurobehavioral Research, A.V. Kalueff, and J.M. Cachat, eds. (Totowa, NJ:  
951 Humana Press), pp. 249–291.
- 952 Fero, K., Bergeron, S.A., Horstick, E.J., Codore, H., Li, G.H., Ono, F., Dowling, J.J., and Burgess, H.A.  
953 (2014). Impaired embryonic motility in *dusp27* mutants reveals a developmental defect in myofibril  
954 structure. *Dis. Model. Mech.* 7, 289–298.
- 955 Förster, D., Dal Maschio, M., Laurell, E., and Baier, H. (2017). An optogenetic toolbox for unbiased  
956 discovery of functionally connected cells in neural circuits. *Nat. Commun.* 8, 116.
- 957 Fulwiler, C.E., and Saper, C.B. (1984). Subnuclear organization of the efferent connections of the  
958 parabrachial nucleus in the rat. *Brain Res.* 319, 229–259.
- 959 Gahtan, E., and O’Malley, D.M. (2003). Visually guided injection of identified reticulospinal neurons in  
960 zebrafish: a survey of spinal arborization patterns. *J. Comp. Neurol.* 459, 186–200.
- 961 Gallup, G.G., Jr. (1977). Tonic immobility: The role of fear and predation. *Psychol. Rec.* 27, 41–61.
- 962 Gallup, G.G., and Rager, D.R. (1996). Tonic Immobility as a Model of Extreme States of Behavioral  
963 Inhibition. In *Motor Activity and Movement Disorders: Research Issues and Applications*, P.R. Sanberg,  
964 K.-P. Ossenkopp, and M. Kavaliers, eds. (Totowa, NJ: Humana Press), pp. 57–80.
- 965 Gibson, W.T., Gonzalez, C.R., Fernandez, C., Ramasamy, L., Tabachnik, T., Du, R.R., Felsen, P.D.,  
966 Maire, M.R., Perona, P., and Anderson, D.J. (2015). Behavioral responses to a repetitive visual threat  
967 stimulus express a persistent state of defensive arousal in *Drosophila*. *Curr. Biol.* 25, 1401–1415.
- 968 Han, S., Soleiman, M.T., Soden, M.E., Zweifel, L.S., and Palmiter, R.D. (2015). Elucidating an Affective  
969 Pain Circuit that Creates a Threat Memory. *Cell* 162, 363–374.
- 970 Harris, J. a., Cheng, A.G., Cunningham, L.L., MacDonald, G., Raible, D.W., and Rubel, E.W. (2003).  
971 Neomycin-induced hair cell death and rapid regeneration in the lateral line of zebrafish (*Danio rerio*). *J.*  
972 *Assoc. Res. Otolaryngol.* 4, 219–234.
- 973 Hempel, C.M., Sugino, K., and Nelson, S.B. (2007). A manual method for the purification of  
974 fluorescently labeled neurons from the mammalian brain. *Nat. Protoc.* 2, 2924–2929.
- 975 Henningsen, A.D. (1994). Tonic immobility in 12 elasmobranchs: Use as an aid in captive husbandry.  
976 *Zoo Biol.* 13, 325–332.
- 977 Henriques, P.M., Rahman, N., Jackson, S.E., and Bianco, I.H. (2019). Nucleus Isthmi Is Required to  
978 Sustain Target Pursuit during Visually Guided Prey-Catching. *Curr. Biol.* 0.
- 979 Horstick, E.J., Jordan, D.C., Bergeron, S.A., Tabor, K.M., Serpe, M., Feldman, B., and Burgess, H.A.  
980 (2015). Increased functional protein expression using nucleotide sequence features enriched in highly  
981 expressed genes in zebrafish. *Nucleic Acids Res.* 43, e48.
- 982 Hsieh, J.-Y., Ulrich, B., Issa, F.A., Wan, J., and Papazian, D.M. (2014). Rapid development of Purkinje  
983 cell excitability, functional cerebellar circuit, and afferent sensory input to cerebellum in zebrafish. *Front.*  
984 *Neural Circuits* 8, 147.
- 985 Humphreys, R.K., and Ruxton, G.D. (2018). A review of thanatosis (death feigning) as an anti-predator  
986 behaviour. *Behav. Ecol. Sociobiol.* 72, 22.

- 987 Ishikawa, T., Shimuta, M., and Häusser, M. (2015). Multimodal sensory integration in single cerebellar  
988 granule cells in vivo. *Elife* 4.
- 989 Jänicke, B., and Coper, H. (1996). Tests in Rodents for Assessing Sensorimotor Performance During  
990 Aging. In *Advances in Psychology*, A.-M. Ferrandez, and N. Teasdale, eds. (North-Holland), pp. 201–  
991 233.
- 992 Jesuthasan, S., Krishnan, S., Cheng, R.-K., and Mathuru, A. (2020). Neural correlates of state transitions  
993 elicited by a chemosensory danger cue. *Prog. Neuropsychopharmacol. Biol. Psychiatry* 110110.
- 994 Kalaf, J., Vilete, L.M.P., Volchan, E., Fiszman, A., Coutinho, E.S.F., Andreoli, S.B., Quintana, M.I., de  
995 Jesus Mari, J., and Figueira, I. (2015). Peritraumatic tonic immobility in a large representative sample of  
996 the general population: association with posttraumatic stress disorder and female gender. *Compr.*  
997 *Psychiatry* 60, 68–72.
- 998 Kinkhabwala, A., Riley, M., Koyama, M., Monen, J., Satou, C., Kimura, Y., Higashijima, S.-I., and  
999 Fetcho, J. (2011). A structural and functional ground plan for neurons in the hindbrain of zebrafish. *Proc.*  
1000 *Natl. Acad. Sci. U. S. A.* 108, 1164–1169.
- 1001 Klemm, W.R. (1976). Identity of sensory and motor systems that are critical to the immobility reflex  
1002 (“animal hypnosis”). *J. Neurosci. Res.* 2, 57–69.
- 1003 Klemm, W.R. (2001). Behavioral arrest: in search of the neural control system. *Prog. Neurobiol.* 65, 453–  
1004 471.
- 1005 Koutsikou, S., Crook, J.J., Earl, E.V., Leith, J.L., Watson, T.C., Lumb, B.M., and Apps, R. (2014). Neural  
1006 substrates underlying fear-evoked freezing: the periaqueductal grey-cerebellar link. *J. Physiol.* 592, 2197–  
1007 2213.
- 1008 Kozłowska, K., Walker, P., McLean, L., and Carrive, P. (2015). Fear and the Defense Cascade: Clinical  
1009 Implications and Management. *Harv. Rev. Psychiatry* 23, 263–287.
- 1010 LeDoux, J.E. (2000). Emotion circuits in the brain. *Annu. Rev. Neurosci.* 23, 155–184.
- 1011 LeDoux, J., and Daw, N.D. (2018). Surviving threats: neural circuit and computational implications of a  
1012 new taxonomy of defensive behaviour. *Nat. Rev. Neurosci.* 19, 269–282.
- 1013 Lefebvre, L., and Sabourin, M. (1977). Effects of spaced and massed repeated elicitation on tonic  
1014 immobility in the goldfish (*Carassius auratus*). *Behav. Biol.* 21, 300–305.
- 1015 Liang, F., Xiong, X.R., Zingg, B., Ji, X.-Y., Zhang, L.I., and Tao, H.W. (2015). Sensory Cortical Control  
1016 of a Visually Induced Arrest Behavior via Corticotectal Projections. *Neuron* 86, 755–767.
- 1017 Lovett-Barron, M., Chen, R., Bradbury, S., Andalman, A.S., Wagle, M., Guo, S., and Deisseroth, K.  
1018 (2020). Multiple convergent hypothalamus–brainstem circuits drive defensive behavior. *Nat. Neurosci.*
- 1019 Marquart, G.D., Tabor, K.M., Brown, M., Strykowski, J.L., Varshney, G.K., LaFave, M.C., Mueller, T.,  
1020 Burgess, S.M., Higashijima, S.-I., and Burgess, H.A. (2015). A 3D Searchable Database of Transgenic  
1021 Zebrafish Gal4 and Cre Lines for Functional Neuroanatomy Studies. *Front. Neural Circuits* 9, 78.
- 1022 Marques, J.C., Lackner, S., Félix, R., and Orger, M.B. (2018). Structure of the Zebrafish Locomotor  
1023 Repertoire Revealed with Unsupervised Behavioral Clustering. *Curr. Biol.* 0.
- 1024 Maruska, K.P., and Tricas, T.C. (2009). Central projections of octavolateralis nerves in the brain of a  
1025 soniferous damselfish (*Abudefduf abdominalis*). *J. Comp. Neurol.* 512, 628–650.



- 1026 Marx, B.P., Forsyth, J.P., Gallup, G.G., Fusé, T., and Lexington, J.M. (2008). Tonic Immobility as an  
1027 Evolved Predator Defense: Implications for Sexual Assault Survivors. *Clin Psychol Sci & Pract* 15, 74–  
1028 90.
- 1029 Matsui, H., Namikawa, K., Babaryka, A., and Köster, R.W. (2014). Functional regionalization of the  
1030 teleost cerebellum analyzed in vivo. *Proc. Natl. Acad. Sci. U. S. A.* 111, 11846–11851.
- 1031 Maximino, C., do Carmo Silva, R.X., Dos Santos Campos, K., de Oliveira, J.S., Rocha, S.P., Pyterson,  
1032 M.P., Dos Santos Souza, D.P., Feitosa, L.M., Ikeda, S.R., Pimentel, A.F.N., et al. (2019). Sensory  
1033 ecology of ostariophysan alarm substances. *J. Fish Biol.* 95, 274–286.
- 1034 McBride, R.L., and Klemm, W.R. (1969). Mechanisms of the immobility reflex.
- 1035 McCormick, C.A., Gallagher, S., Cantu-Hertzler, E., and Woodrick, S. (2016). Mechanosensory Lateral  
1036 Line Nerve Projections to Auditory Neurons in the Dorsal Descending Octaval Nucleus in the Goldfish,  
1037 *Carassius auratus*. *Brain Behav. Evol.* 88, 68–80.
- 1038 Menescal-de-Oliveira, L., and Hoffmann, A. (1993). The parabrachial region as a possible region  
1039 modulating simultaneously pain and tonic immobility. *Behav. Brain Res.* 56, 127–132.
- 1040 Mo, W., and Nicolson, T. (2011). Both pre- and postsynaptic activity of Nsf prevents degeneration of  
1041 hair-cell synapses. *PLoS One* 6, e27146.
- 1042 New, J.G., and Northcutt, R.G. (1984). Central projections of the lateral line nerves in the shovelnose  
1043 sturgeon. *J. Comp. Neurol.* 225, 129–140.
- 1044 Orger, M.B., Kampff, A.R., Severi, K.E., Bollmann, J.H., and Engert, F. (2008). Control of visually  
1045 guided behavior by distinct populations of spinal projection neurons. *Nat. Neurosci.* 11, 327–333.
- 1046 Palmiter, R.D. (2018). The Parabrachial Nucleus: CGRP Neurons Function as a General Alarm. *Trends*  
1047 *Neurosci.* 41, 280–293.
- 1048 Perrins, R., Walford, A., and Roberts, A. (2002). Sensory Activation and Role of Inhibitory  
1049 Reticulospinal Neurons that Stop Swimming in Hatchling Frog Tadpoles. *J. Neurosci.* 22, 4229–4240.
- 1050 Randlett, O., Wee, C.L., Naumann, E. a., Nnaemeka, O., Schoppik, D., Fitzgerald, J.E., Portugues, R.,  
1051 Lacoste, A.M.B., Riegler, C., Engert, F., et al. (2015). Whole-brain activity mapping onto a zebrafish  
1052 brain atlas. *Nat. Methods* 12, 1–12.
- 1053 Roelofs, K. (2017). Freeze for action: neurobiological mechanisms in animal and human freezing. *Philos.*  
1054 *Trans. R. Soc. Lond. B Biol. Sci.* 372.
- 1055 Rogers, S.M., and Simpson, S.J. (2014). Thanatosis. *Curr. Biol.* 24, R1031-3.
- 1056 Roseberry, T., and Kreitzer, A. (2017). Neural circuitry for behavioural arrest. *Philos. Trans. R. Soc.*  
1057 *Lond. B Biol. Sci.* 372.
- 1058 Ryan, S.J., Ehrlich, D.E., Jasnow, A.M., Daftary, S., Madsen, T.E., and Rainnie, D.G. (2012). Spike-  
1059 timing precision and neuronal synchrony are enhanced by an interaction between synaptic inhibition and  
1060 membrane oscillations in the amygdala. *PLoS One* 7, e35320.
- 1061 Saab, C.Y., and Willis, W.D. (2003). The cerebellum: organization, functions and its role in nociception.  
1062 *Brain Res. Brain Res. Rev.* 42, 85–95.

- 1063 Satou, C., Kimura, Y., Hirata, H., Suster, M.L., Kawakami, K., and Higashijima, S.-I. (2013). Transgenic  
1064 tools to characterize neuronal properties of discrete populations of zebrafish neurons. *Development* *140*,  
1065 3927–3931.
- 1066 Sawtell, N.B. (2010). Multimodal integration in granule cells as a basis for associative plasticity and  
1067 sensory prediction in a cerebellum-like circuit. *Neuron* *66*, 573–584.
- 1068 Shen, W., Da Silva, J.S., He, H., and Cline, H.T. (2009). Type A GABA-receptor-dependent synaptic  
1069 transmission sculpts dendritic arbor structure in *Xenopus* tadpoles in vivo. *J. Neurosci.* *29*, 5032–5043.
- 1070 Shen, W., McKeown, C.R., Demas, J.A., and Cline, H.T. (2011). Inhibition to excitation ratio regulates  
1071 visual system responses and behavior in vivo. *J. Neurophysiol.* *106*, 2285–2302.
- 1072 Sherman, J.E., and Kalin, N.H. (1988). ICV-CRH alters stress-induced freezing behavior without  
1073 affecting pain sensitivity. *Pharmacology Biochemistry and Behavior* *30*, 801–807.
- 1074 Sisneros, J.A., Tricas, T.C., and Luer, C.A. (1998). Response properties and biological function of the  
1075 skate electrosensory system during ontogeny. *J. Comp. Physiol. A* *183*, 87–99.
- 1076 Sohal, V.S., Pangratz-Fuehrer, S., Rudolph, U., and Huguenard, J.R. (2006). Intrinsic and synaptic  
1077 dynamics interact to generate emergent patterns of rhythmic bursting in thalamocortical neurons. *J.*  
1078 *Neurosci.* *26*, 4247–4255.
- 1079 Son, J.-H., Keefe, M.D., Stevenson, T.J., Barrios, J.P., Anjewierden, S., Newton, J.B., Douglass, A.D.,  
1080 and Bonkowsky, J.L. (2016). Transgenic FingRs for Live Mapping of Synaptic Dynamics in Genetically-  
1081 Defined Neurons. *Sci. Rep.* *6*, 18734.
- 1082 Speedie, N., and Gerlai, R. (2008). Alarm substance induced behavioral responses in zebrafish (*Danio*  
1083 *rerio*). *Behav. Brain Res.* *188*, 168–177.
- 1084 Spinieli, R.L., and Leite-Panissi, C.R.A. (2018). Similar effect of CRF1 and CRF2 receptor in the  
1085 basolateral or central nuclei of the amygdala on tonic immobility behavior. *Brain Res. Bull.* *137*, 187–  
1086 196.
- 1087 Supple, W.F., Jr, Cranney, J., and Leaton, R.N. (1988). Effects of lesions of the cerebellar vermis on  
1088 VMH lesion-induced hyperdefensiveness, spontaneous mouse killing, and freezing in rats. *Physiol.*  
1089 *Behav.* *42*, 145–153.
- 1090 Tabor, K.M., Bergeron, S. a., Horstick, E.J., Jordan, D.C., Aho, V., Porkka-Heiskanen, T., Haspel, G.,  
1091 and Burgess, H. a. (2014). Direct activation of the Mauthner cell by electric field pulses drives ultrarapid  
1092 escape responses. *J. Neurophysiol.* *112*, 834–844.
- 1093 Tabor, K.M., Smith, T.S., Brown, M., Bergeron, S.A., Briggman, K.L., and Burgess, H.A. (2018).  
1094 Presynaptic Inhibition Selectively Gates Auditory Transmission to the Brainstem Startle Circuit. *Curr.*  
1095 *Biol.* *28*, 2527-2535.e8.
- 1096 Tabor, K.M., Marquart, G.D., Hurt, C., Smith, T.S., Geoca, A.K., Bhandiwad, A.A., Subedi, A., Sinclair,  
1097 J.L., Rose, H.M., Polys, N.F., et al. (2019). Brain-wide cellular resolution imaging of Cre transgenic  
1098 zebrafish lines for functional circuit-mapping. *Elife* *8*.
- 1099 Takeuchi, M., Matsuda, K., Yamaguchi, S., Asakawa, K., Miyasaka, N., Lal, P., Yoshihara, Y., Koga, A.,  
1100 Kawakami, K., Shimizu, T., et al. (2015). Establishment of Gal4 transgenic zebrafish lines for analysis of  
1101 development of cerebellar neural circuitry. *Dev. Biol.* *397*, 1–17.

- 1102 Tovote, P., Esposito, M.S., Botta, P., Chaudun, F., Fadok, J.P., Markovic, M., Wolff, S.B.E.,  
1103 Ramakrishnan, C., Fenno, L., Deisseroth, K., et al. (2016). Midbrain circuits for defensive behaviour.  
1104 *Nature* 534, 206–212.
- 1105 Tremere, L.A., Pinaud, R., Irwin, R.P., and Allen, C.N. (2008). Postinhibitory rebound spikes are  
1106 modulated by the history of membrane hyperpolarization in the SCN. *Eur. J. Neurosci.* 28, 1127–1135.
- 1107 Vaaga, C.E., Brown, S.T., and Raman, I.M. (2020). Cerebellar modulation of synaptic input to freezing-  
1108 related neurons in the periaqueductal gray. *Elife* 9.
- 1109 Volchan, E., Rocha-Rego, V., Bastos, A.F., Oliveira, J.M., Franklin, C., Gleiser, S., Berger, W., Souza,  
1110 G.G.L., Oliveira, L., David, I.A., et al. (2017). Immobility reactions under threat: A contribution to  
1111 human defensive cascade and PTSD. *Neurosci. Biobehav. Rev.* 76, 29–38.
- 1112 Volkmann, K., Rieger, S., Babaryka, A., and Köster, R.W. (2008). The zebrafish cerebellar rhombic lip is  
1113 spatially patterned in producing granule cell populations of different functional compartments. *Dev. Biol.*  
1114 313, 167–180.
- 1115 Watson, C., Bartholomaeus, C., and Puelles, L. (2019). Time for Radical Changes in Brain Stem  
1116 Nomenclature—Applying the Lessons From Developmental Gene Patterns. *Front. Neuroanat.* 13, 10.
- 1117 Witter, L., Canto, C.B., Hoogland, T.M., de Gruijl, J.R., and De Zeeuw, C.I. (2013). Strength and timing  
1118 of motor responses mediated by rebound firing in the cerebellar nuclei after Purkinje cell activation.  
1119 *Front. Neural Circuits* 7, 133.
- 1120 Yeomans, J.S., and Frankland, P.W. (1995). The acoustic startle reflex: neurons and connections. *Brain*  
1121 *Res. Brain Res. Rev.* 21, 301–314.
- 1122 Yokogawa, T., Hannan, M.C., and Burgess, H. a. (2012). The Dorsal Raphe Modulates Sensory  
1123 Responsiveness during Arousal in Zebrafish. *J. Neurosci.* 32, 15205–15215.
- 1124 Yoshida, M. (2021). Immobility Behaviors in Fish: A Comparison with Other Vertebrates. In *Death-*  
1125 *Feigning in Insects: Mechanism and Function of Tonic Immobility*, M. Sakai, ed. (Singapore: Springer  
1126 Singapore), pp. 159–178.
- 1127 Zacarias, R., Namiki, S., Card, G.M., Vasconcelos, M.L., and Moita, M.A. (2018). Speed dependent  
1128 descending control of freezing behavior in *Drosophila melanogaster*. *Nat. Commun.* 9, 3697.
- 1129 Zheng, N., and Raman, I.M. (2009). Ca currents activated by spontaneous firing and synaptic  
1130 disinhibition in neurons of the cerebellar nuclei. *J. Neurosci.* 29, 9826–9838.

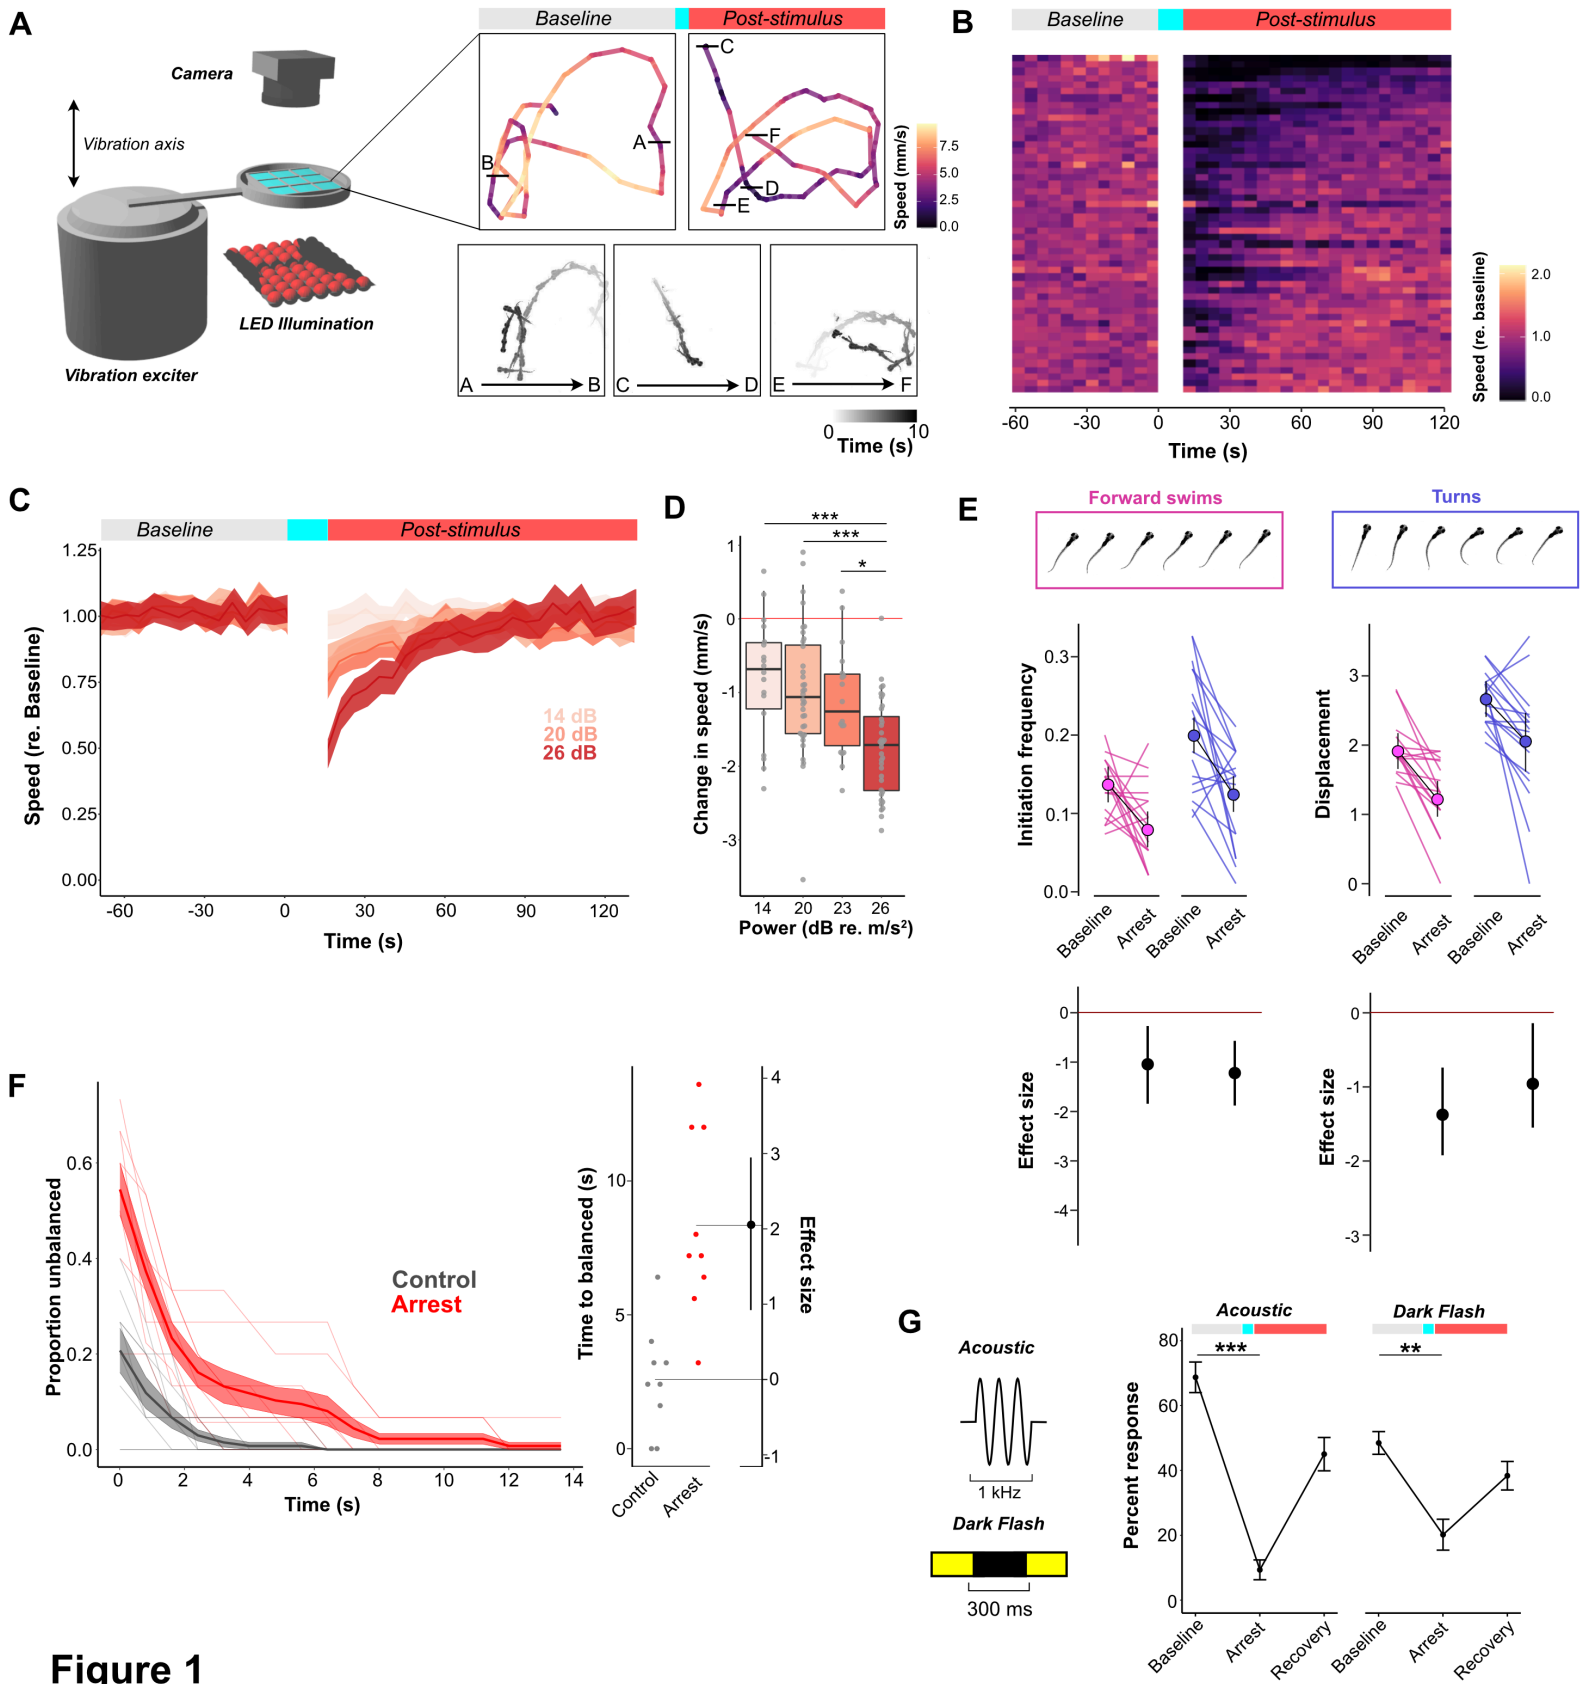

**Figure 1**

**A**

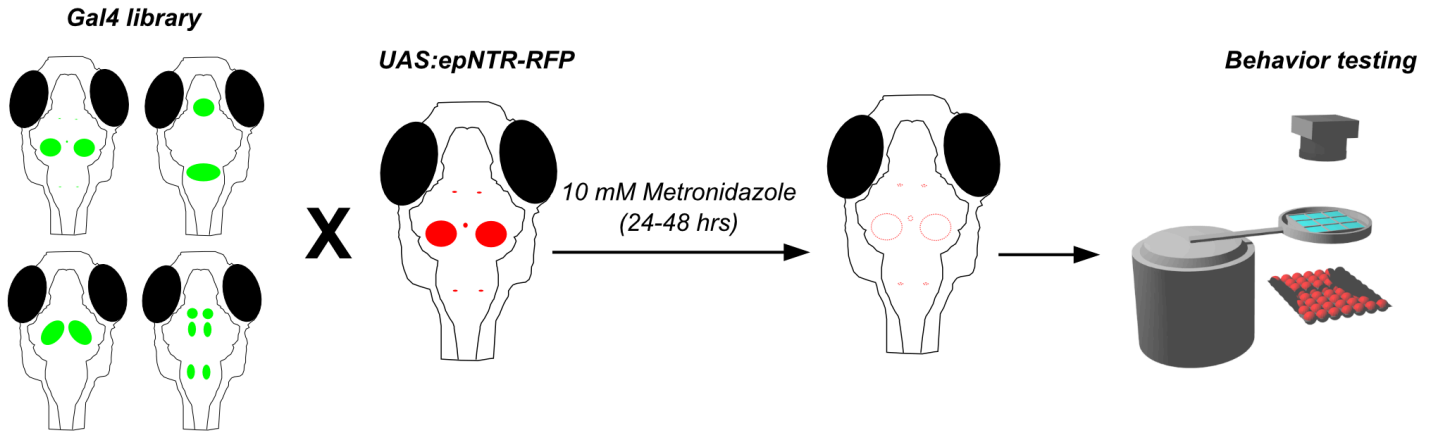

**B**

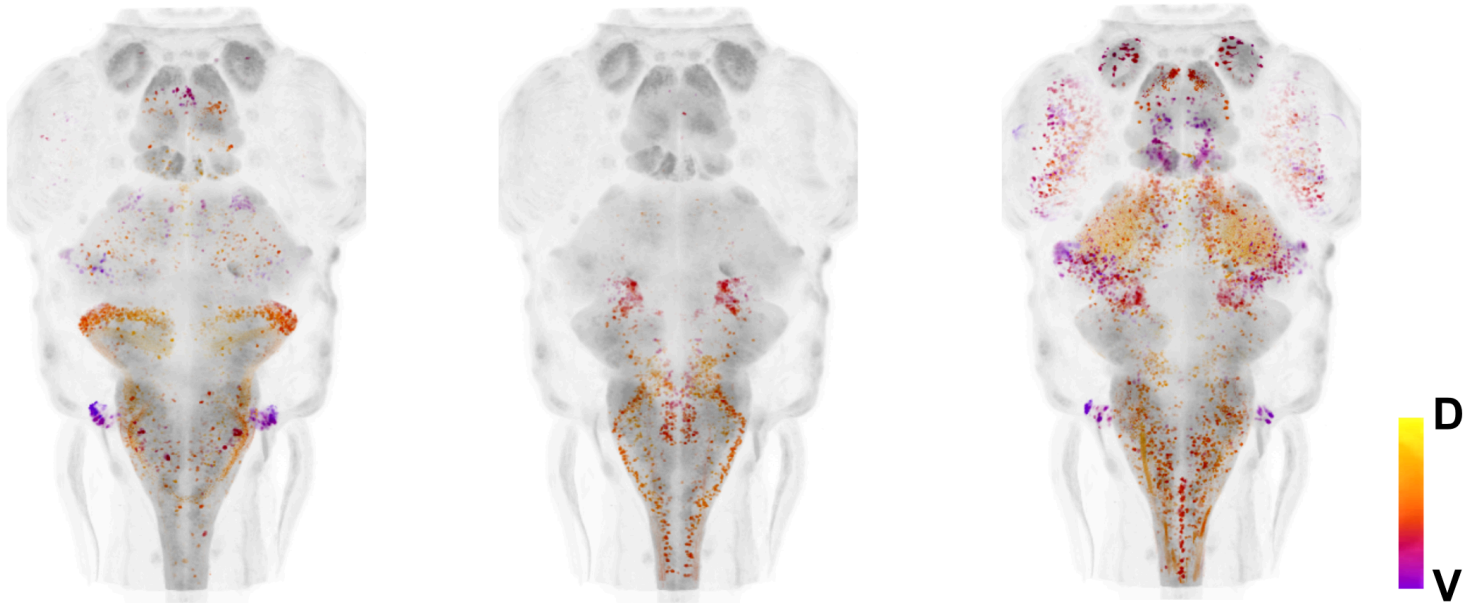

**C**

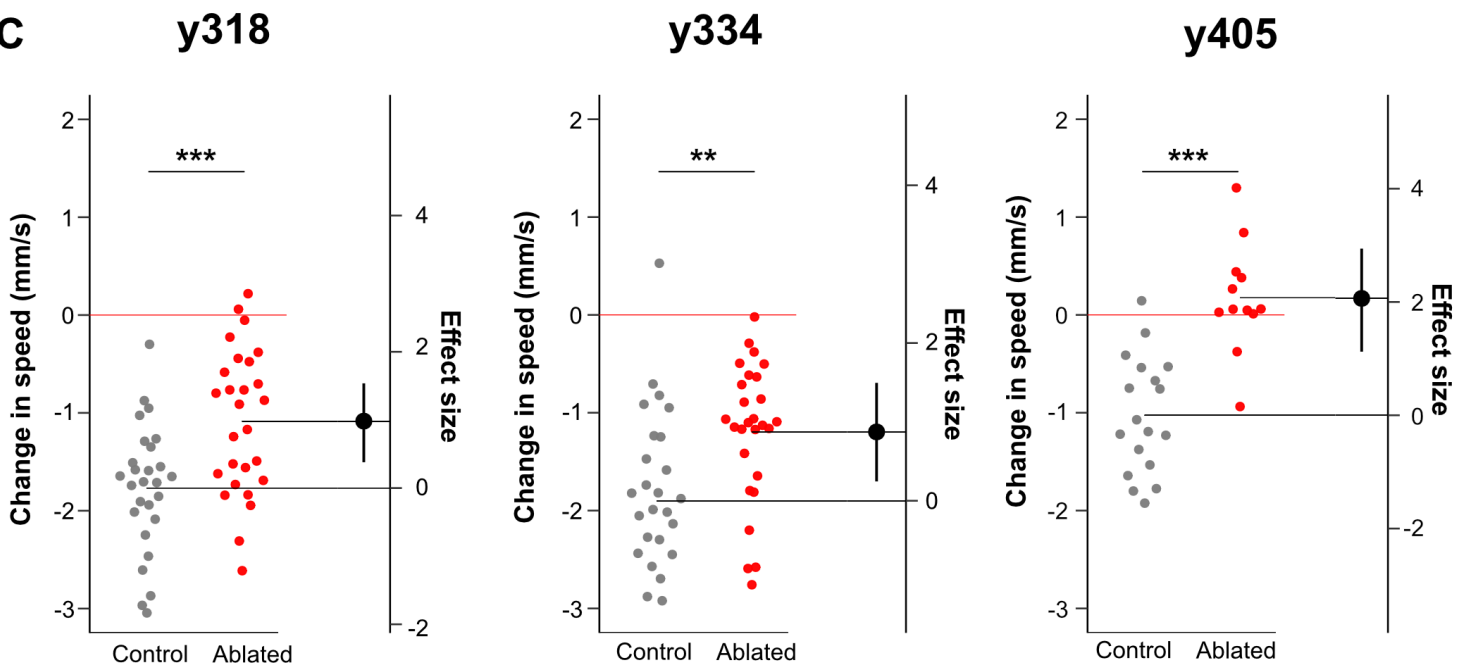

**Figure 2**

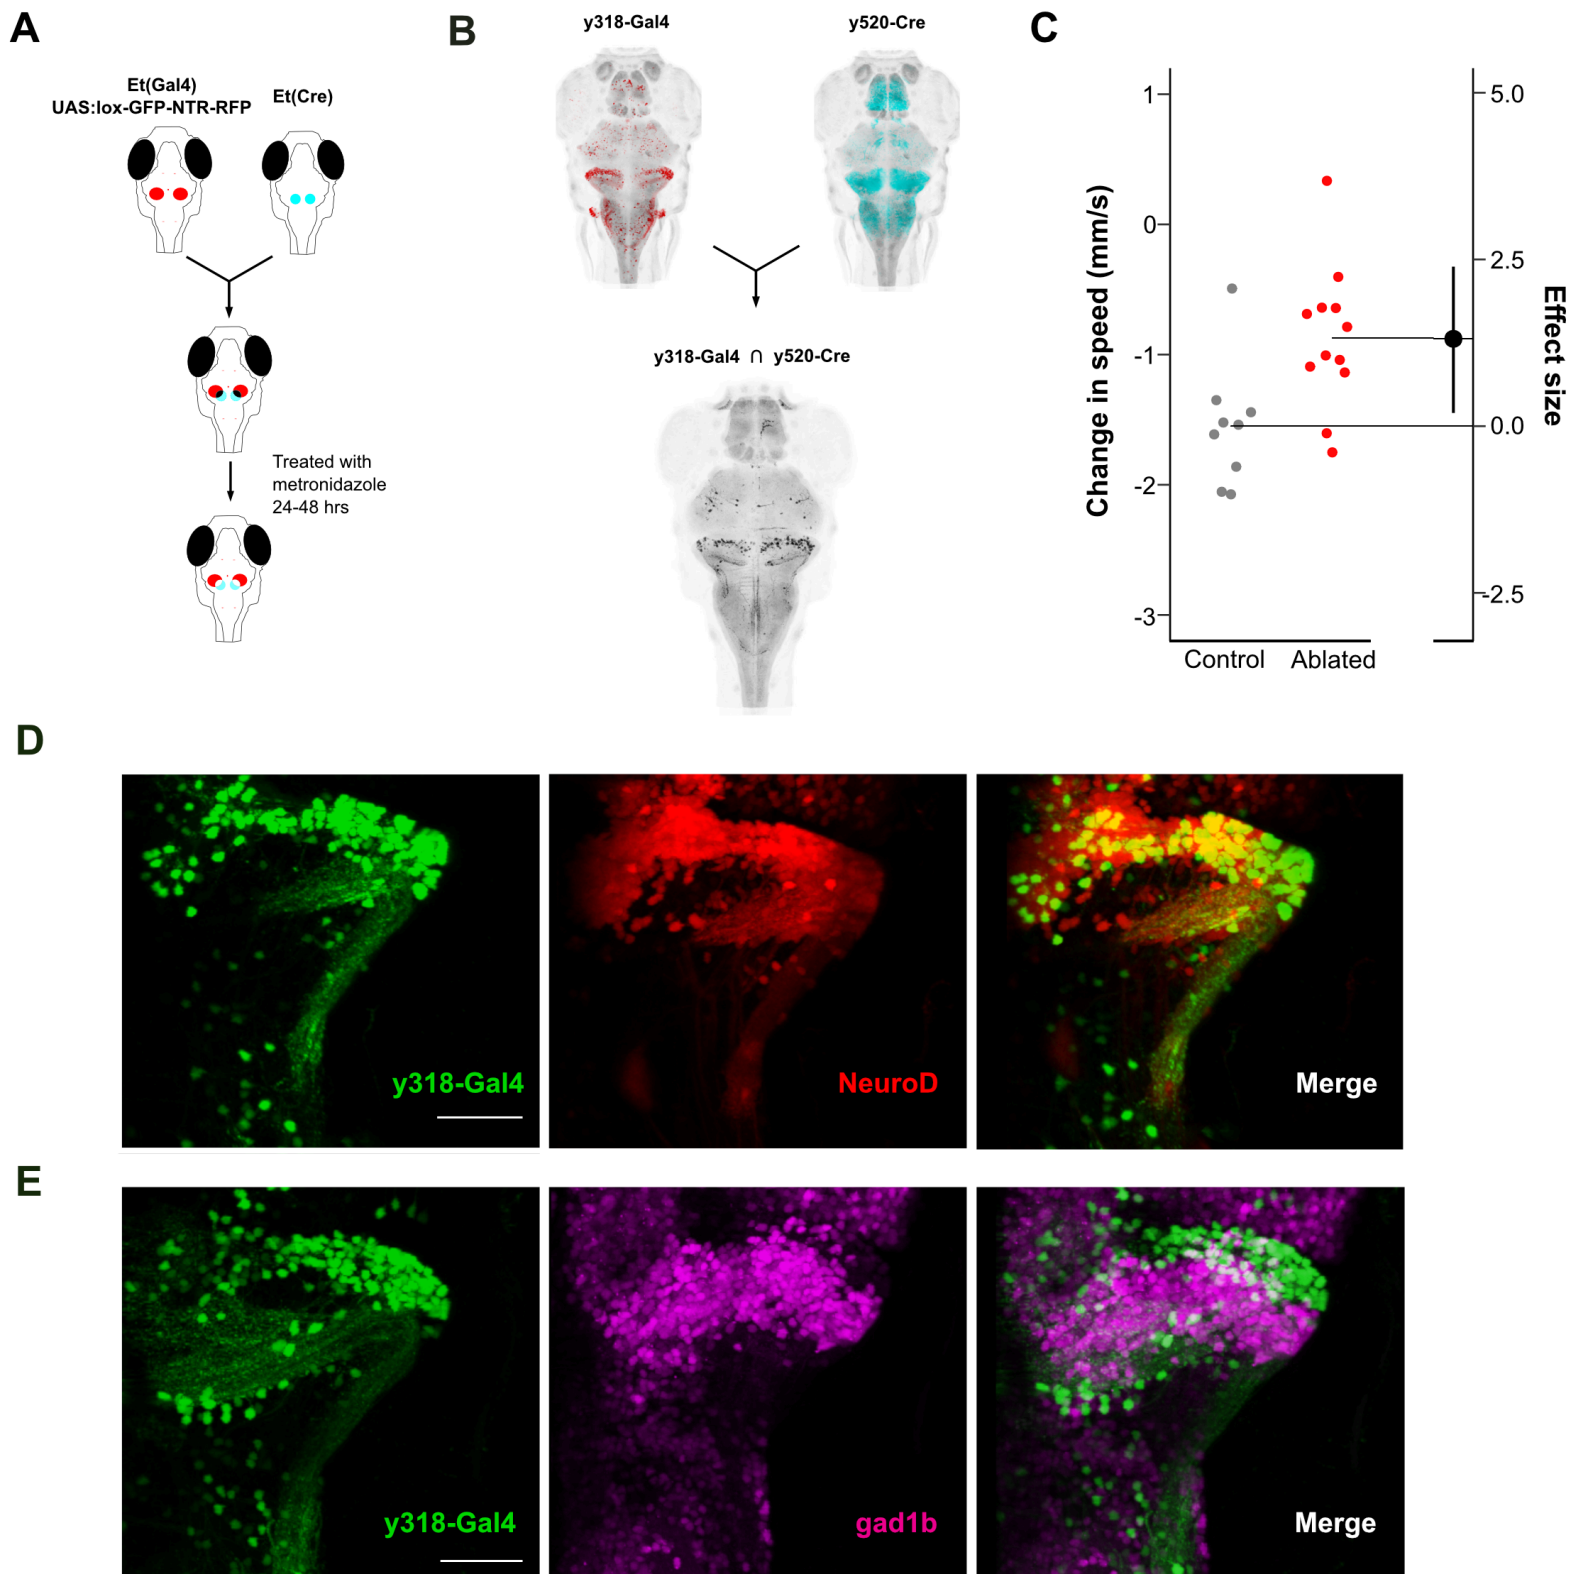

Figure 3

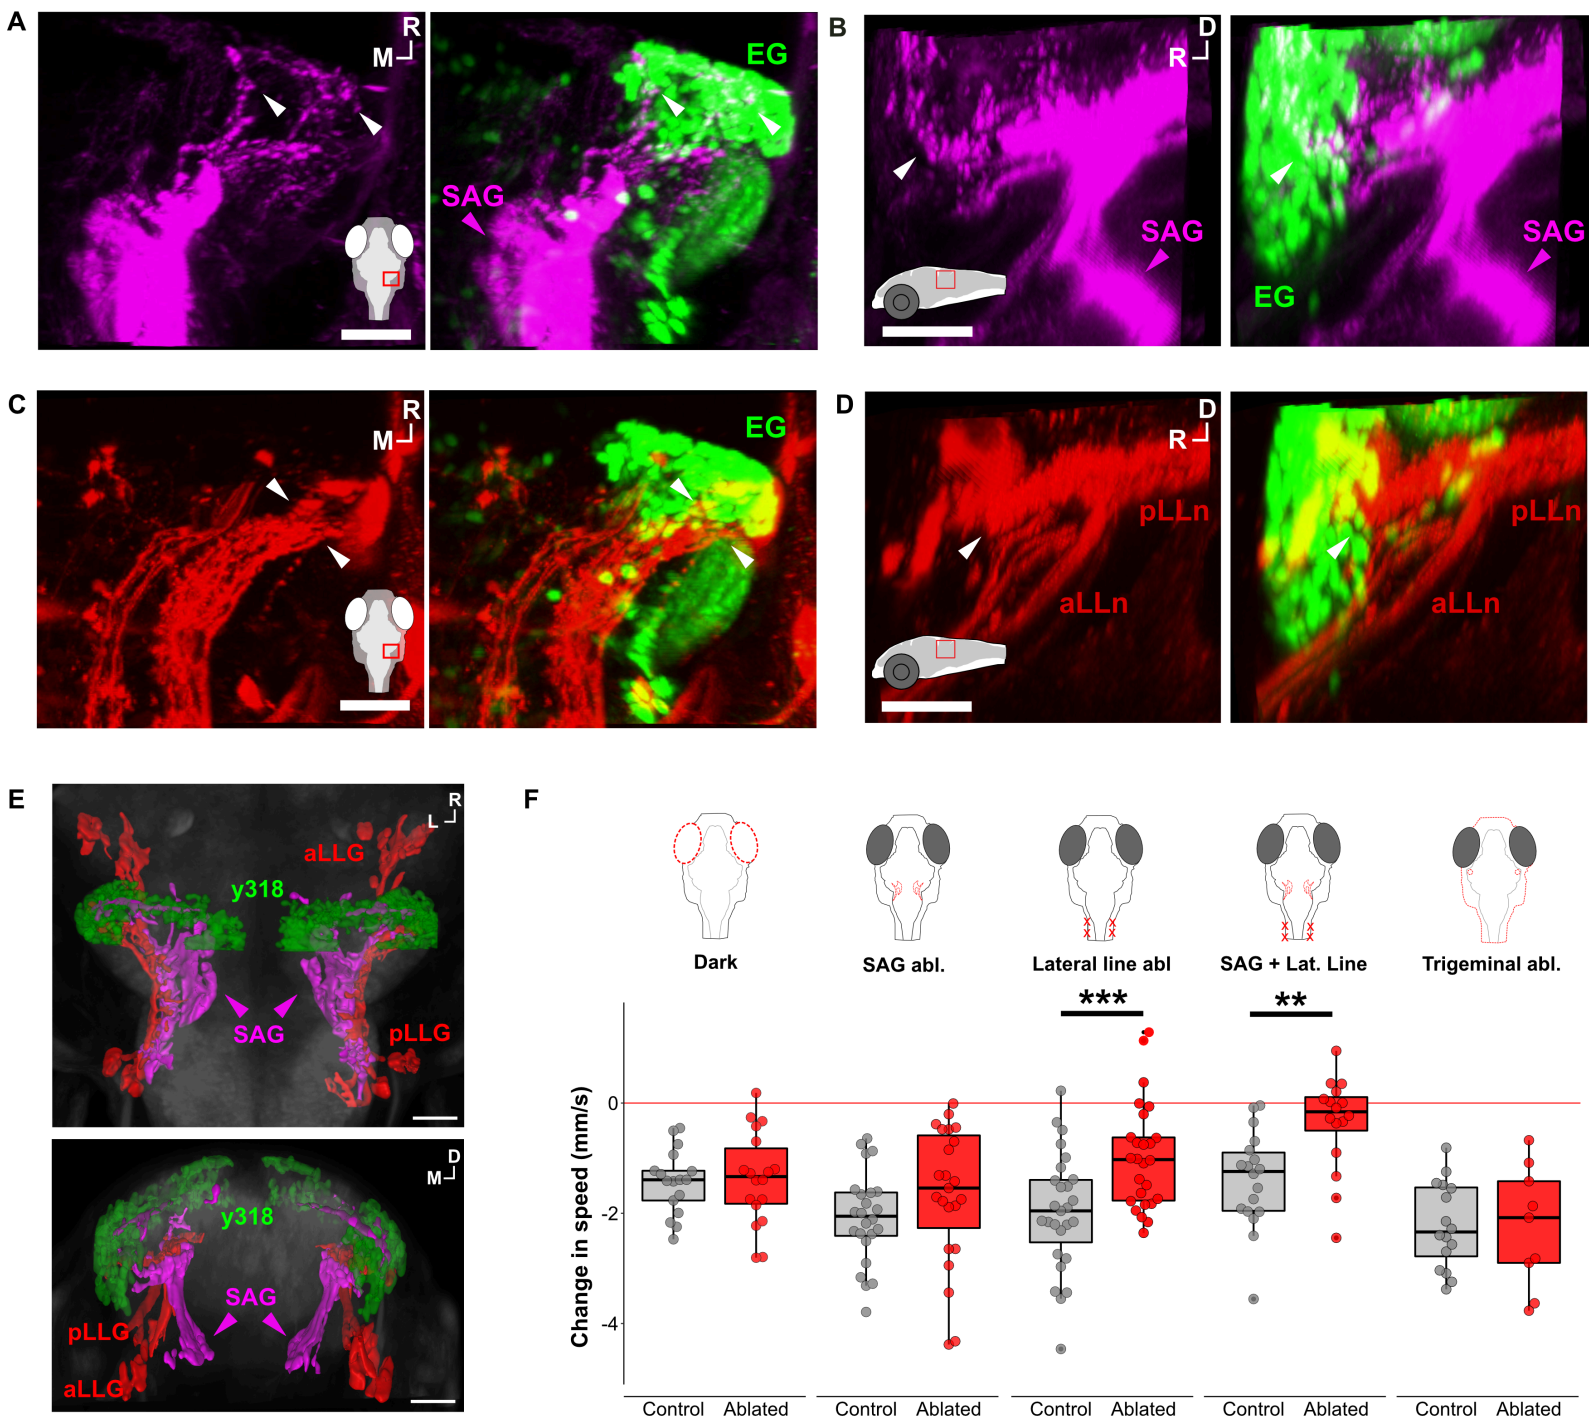

Figure 4

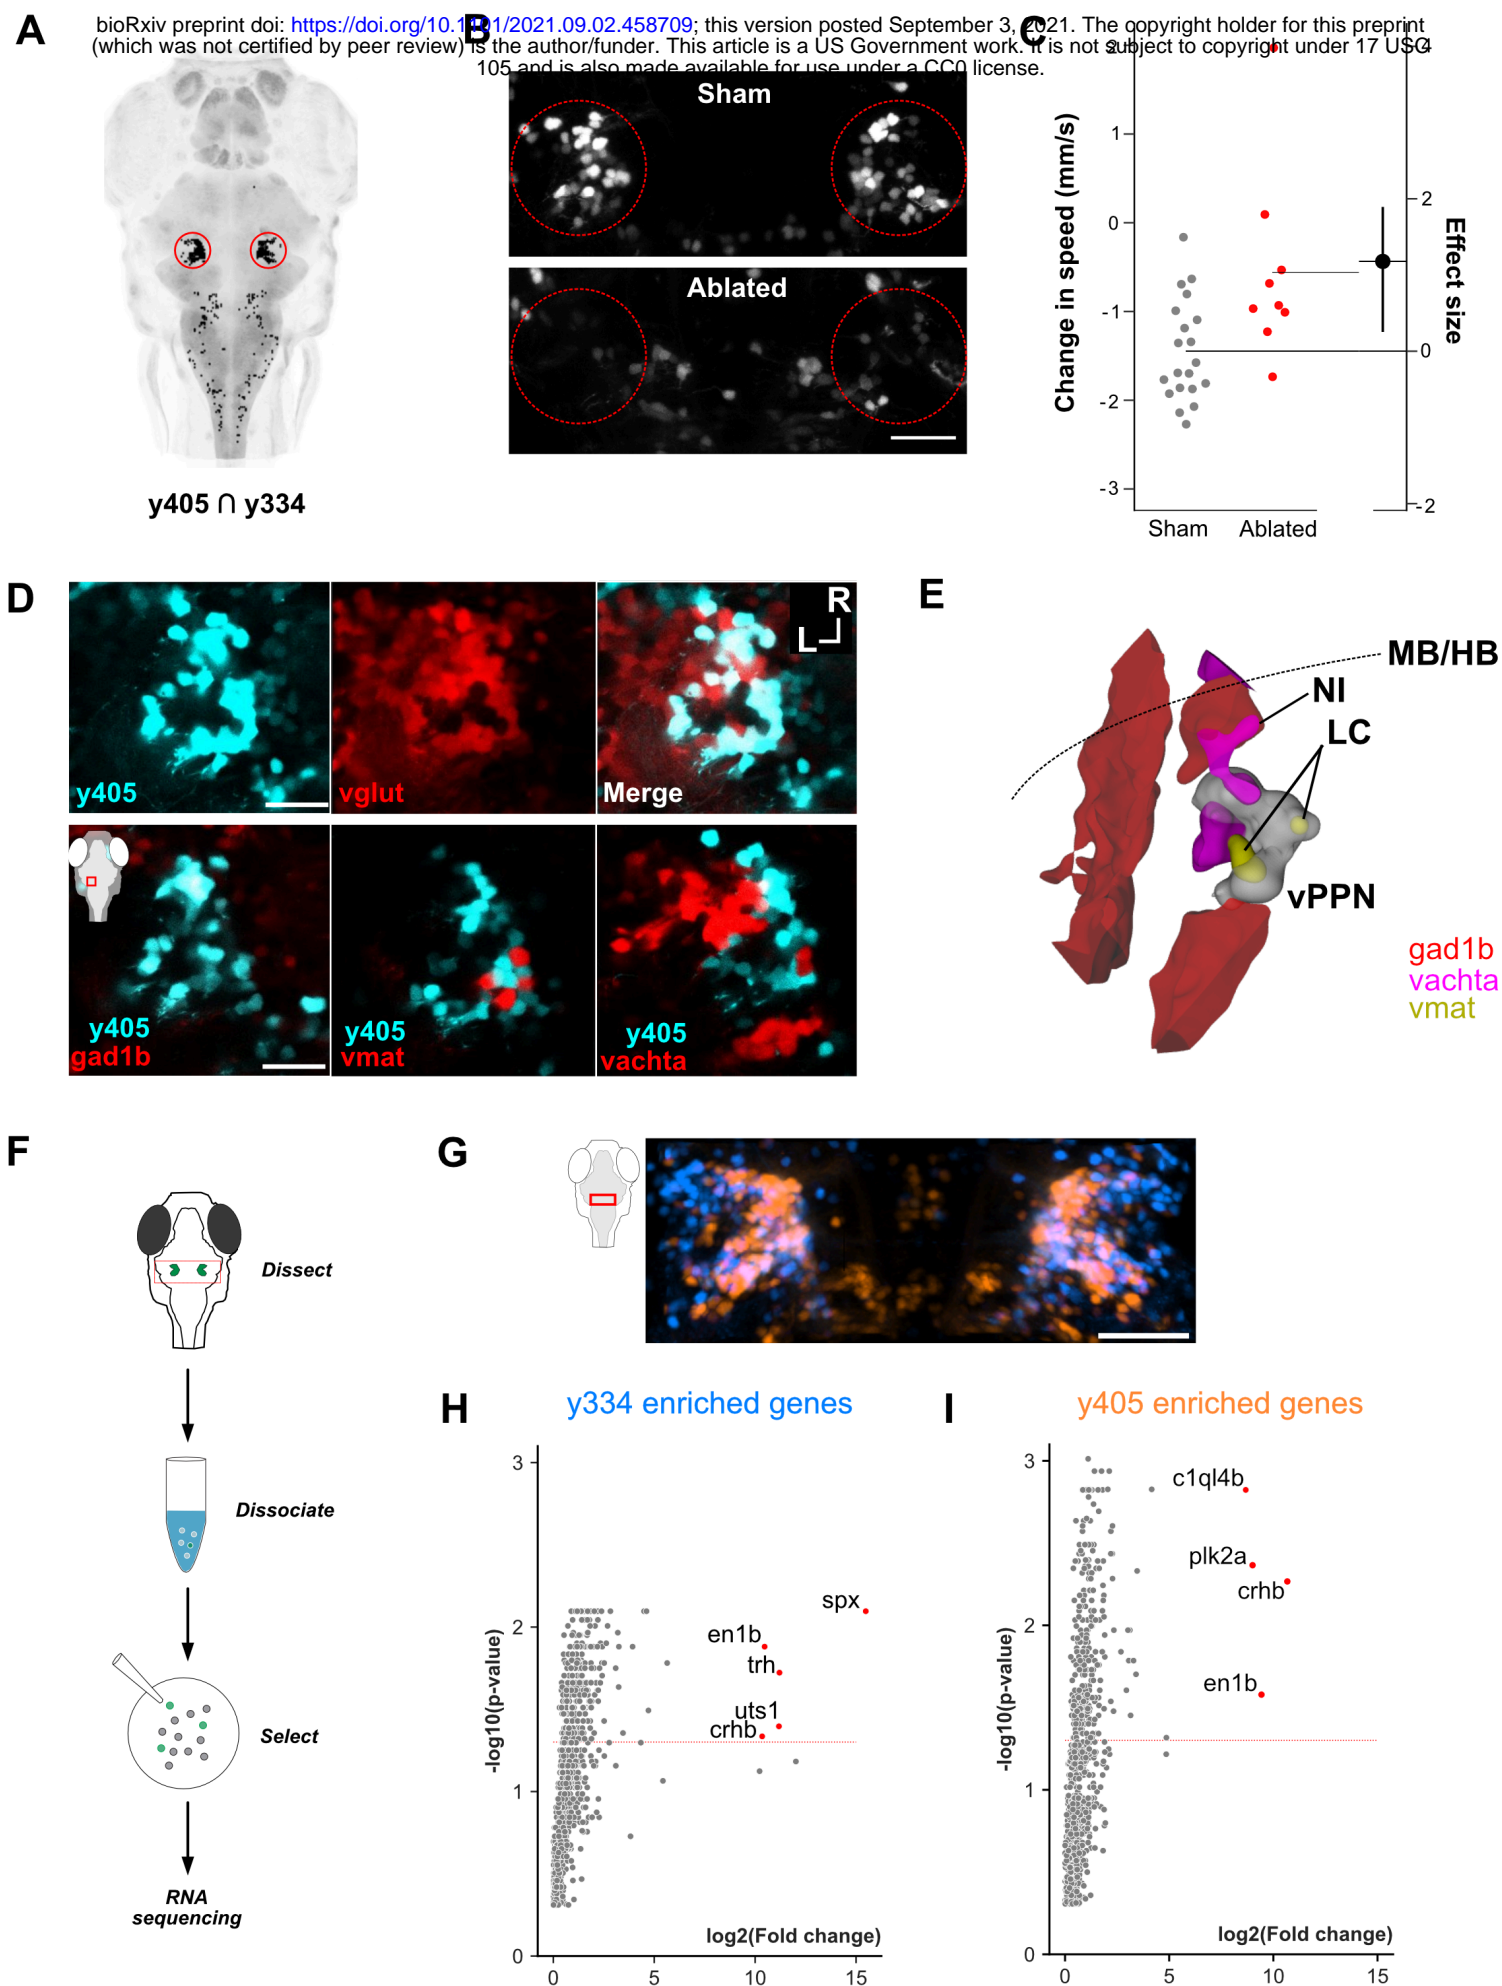

**Figure 5**



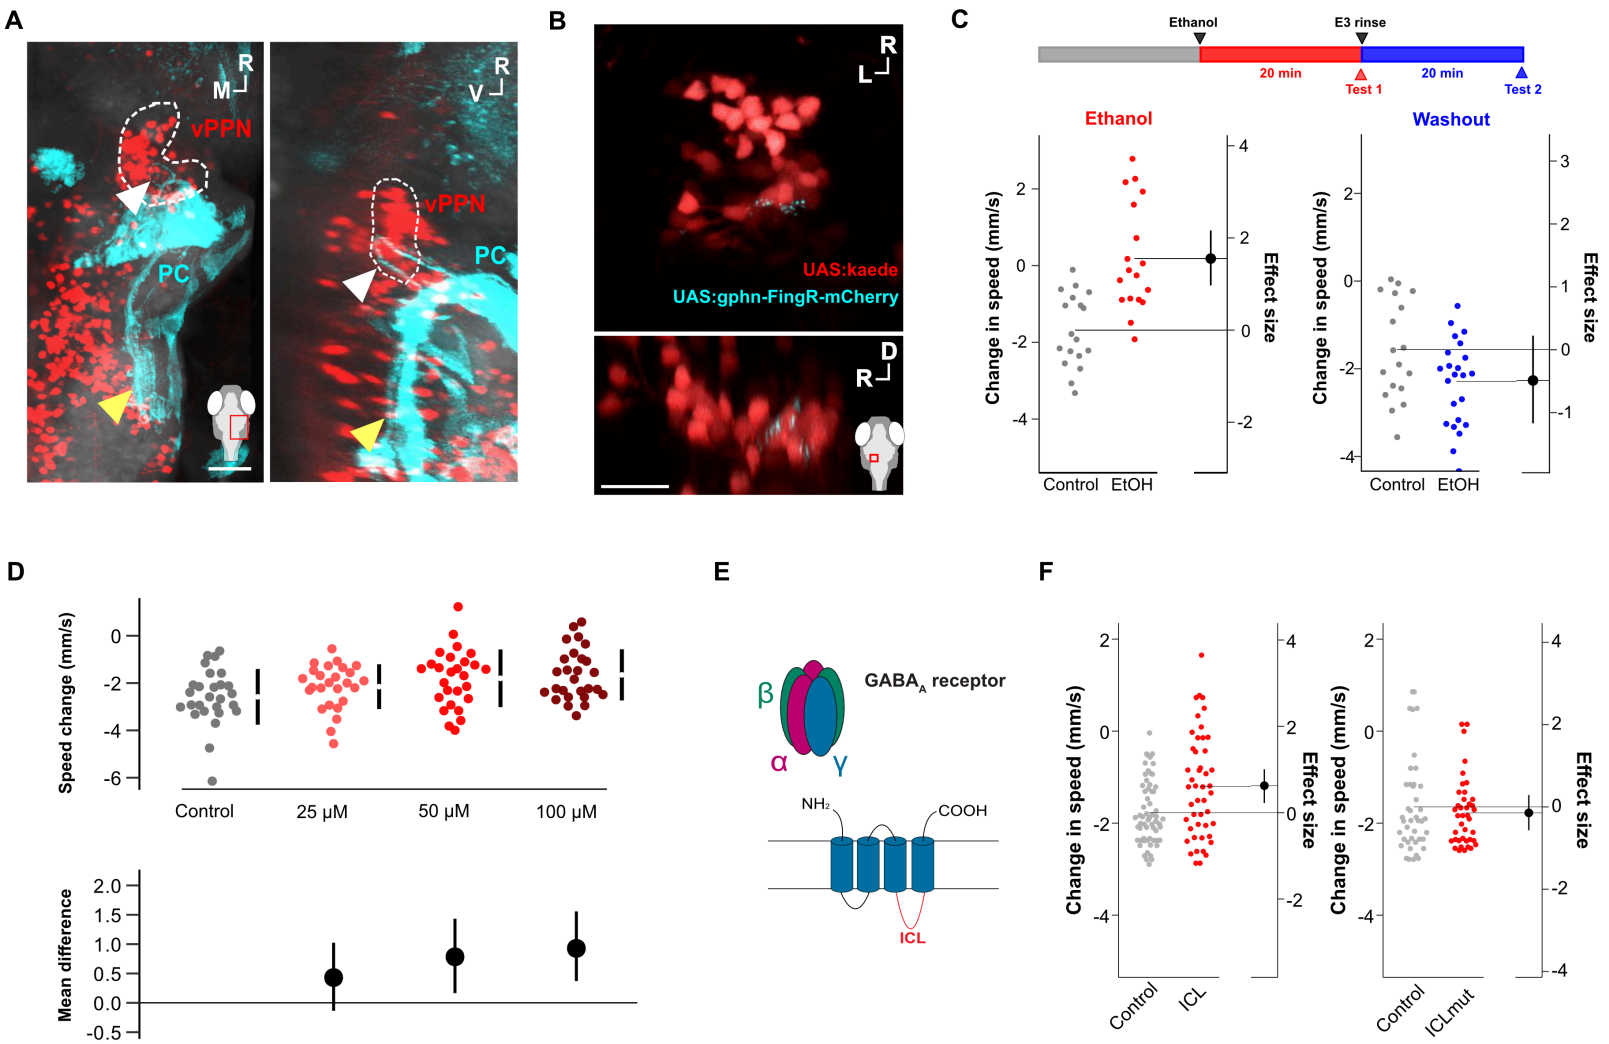

Figure 6

A

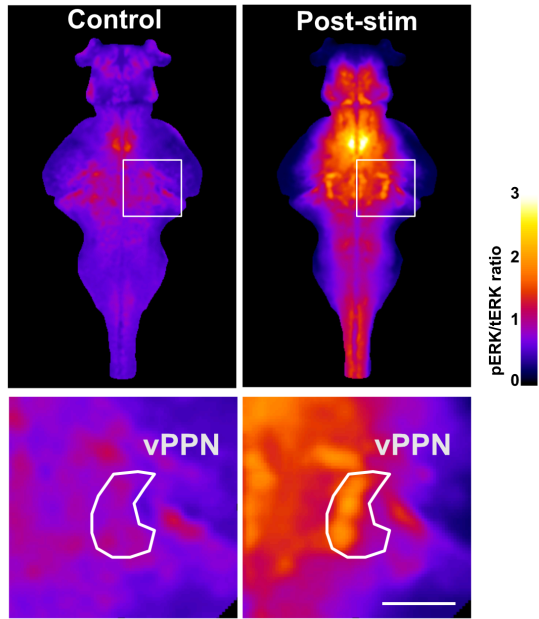

B

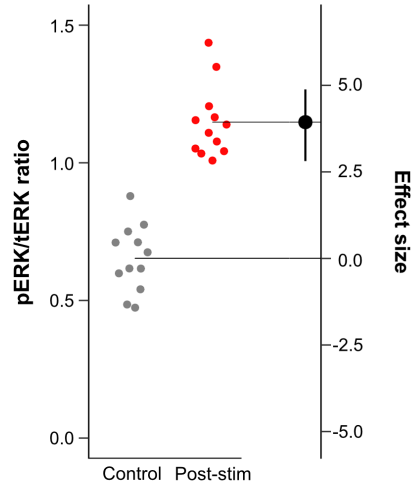

C

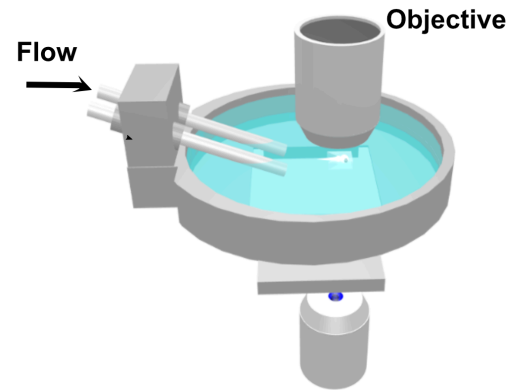

D

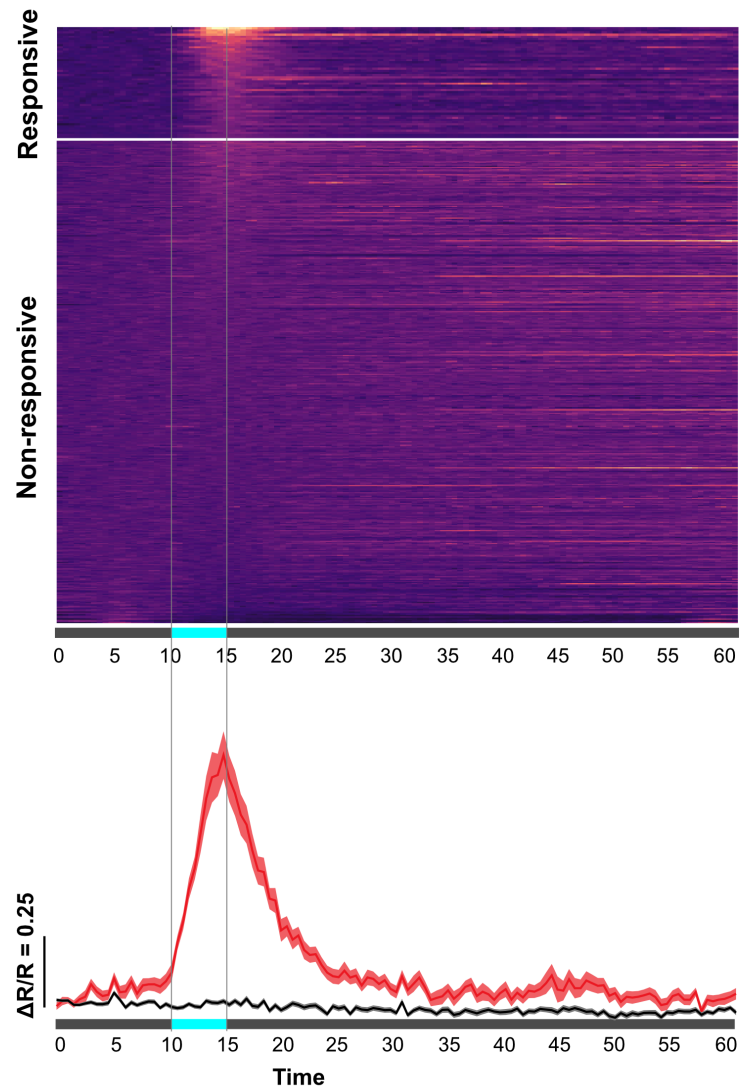

E

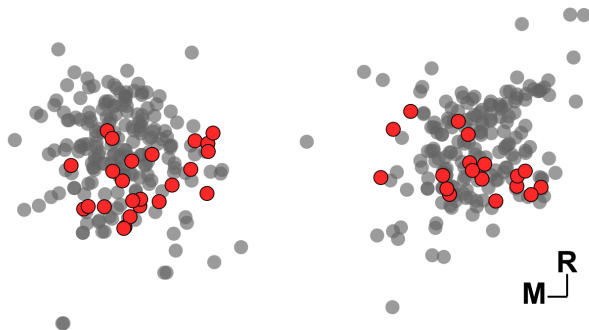

F

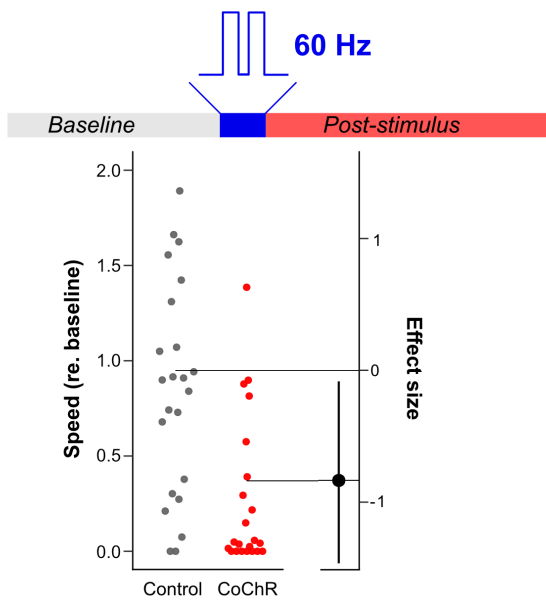

Figure 7

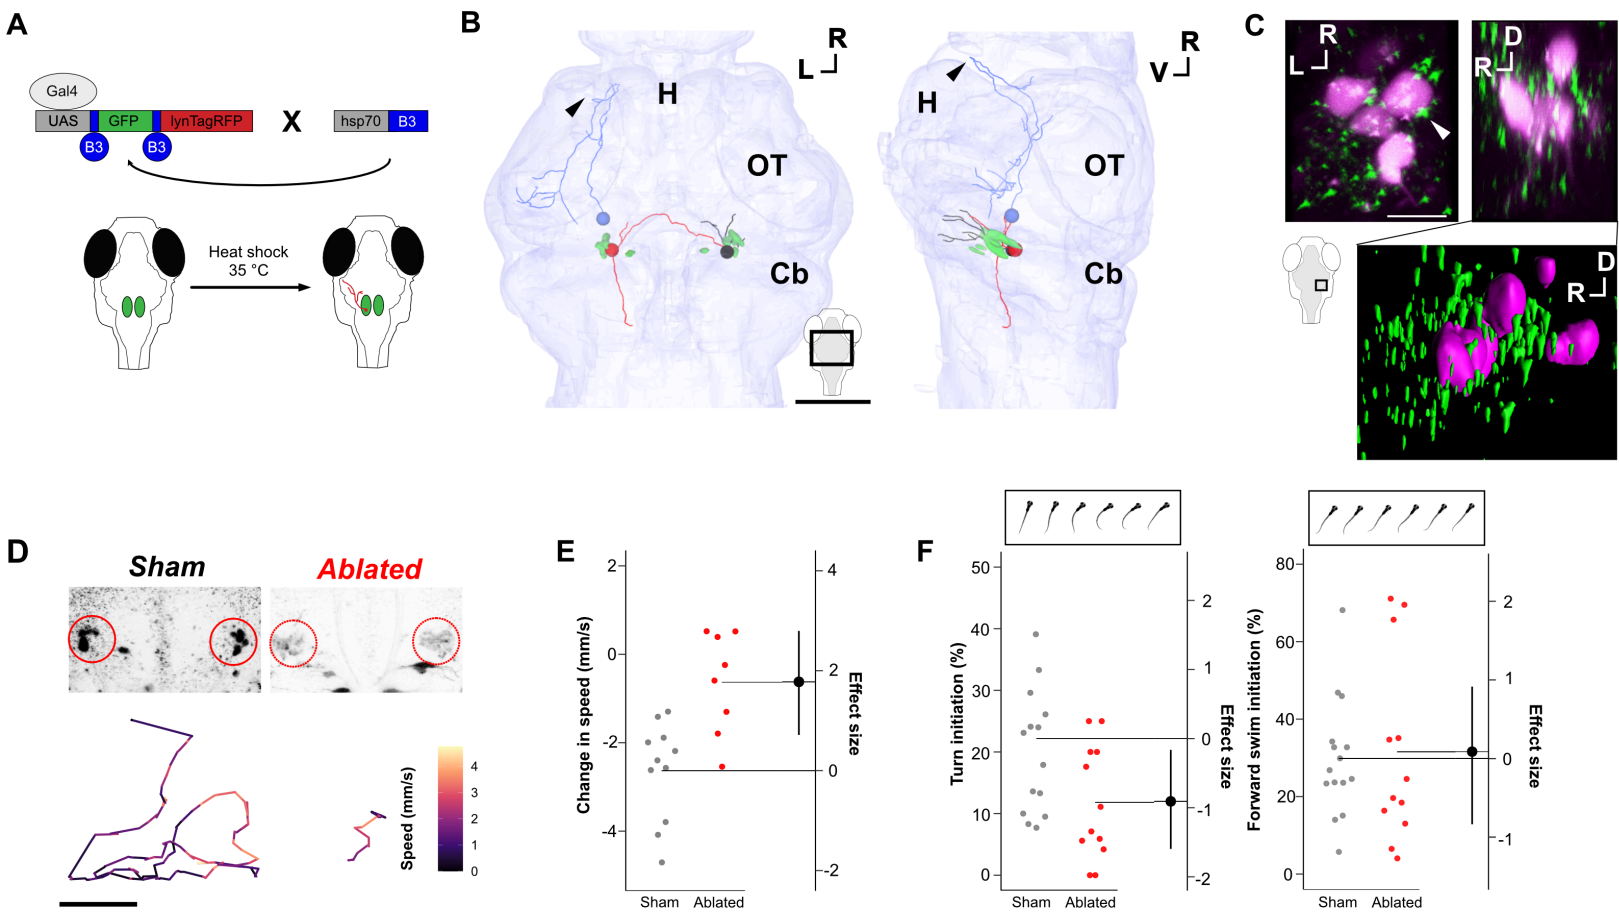

Figure 8

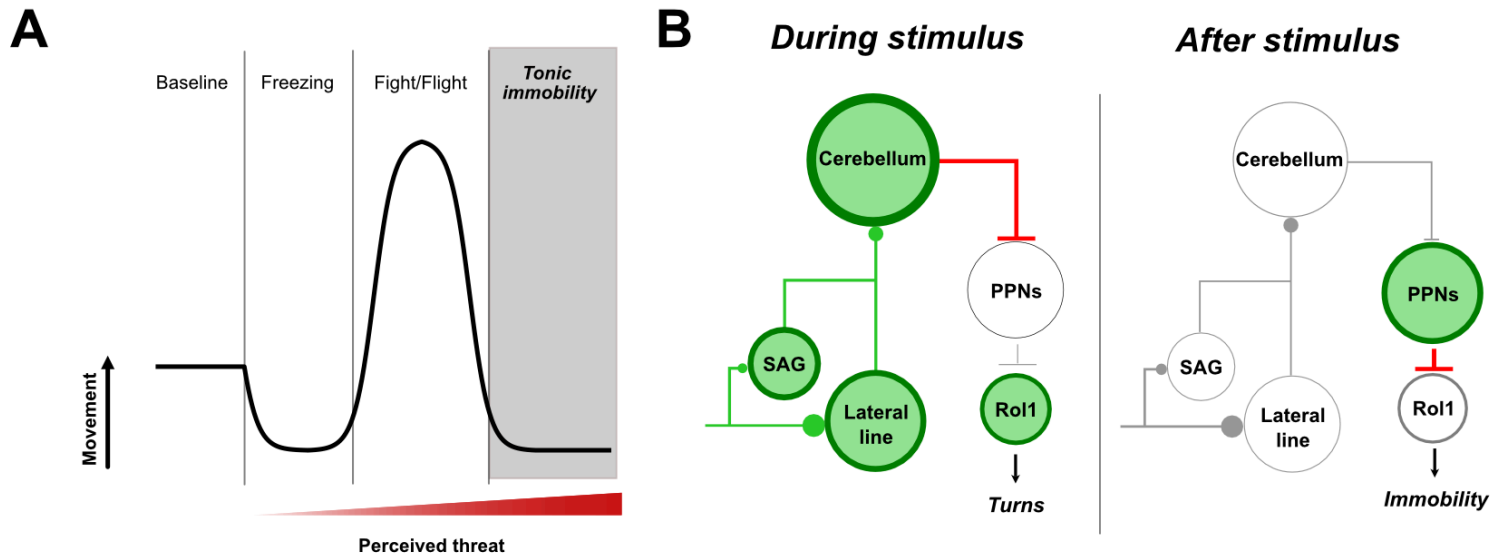

**Figure 9**

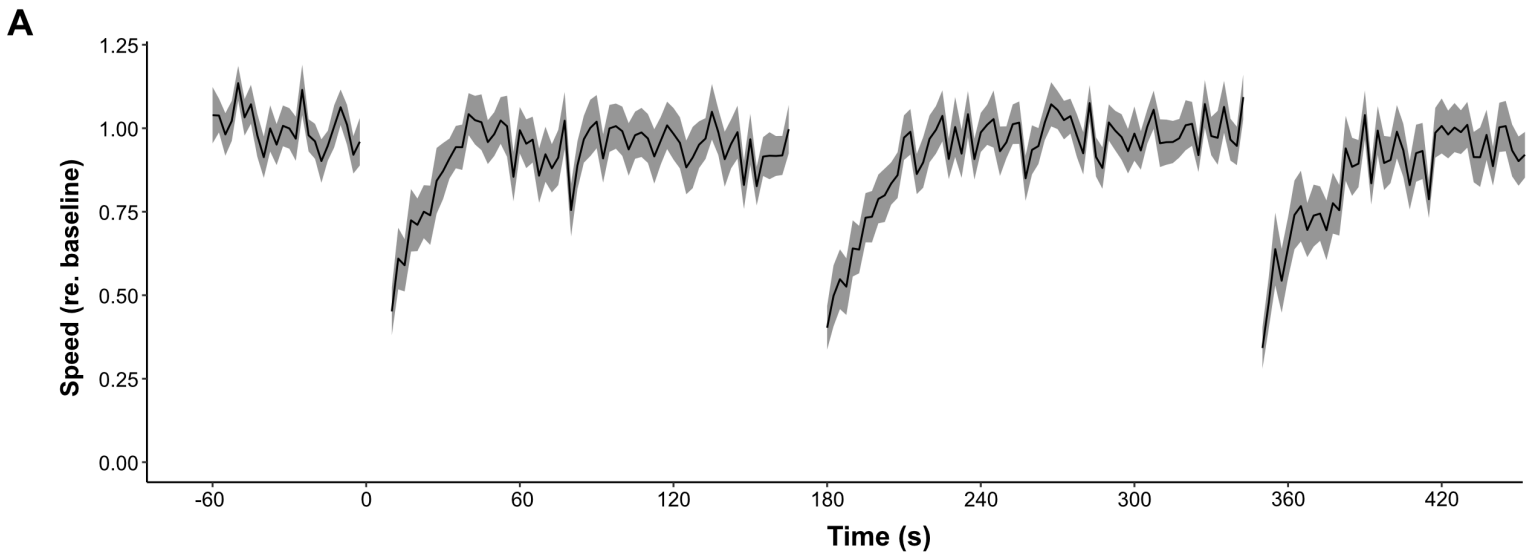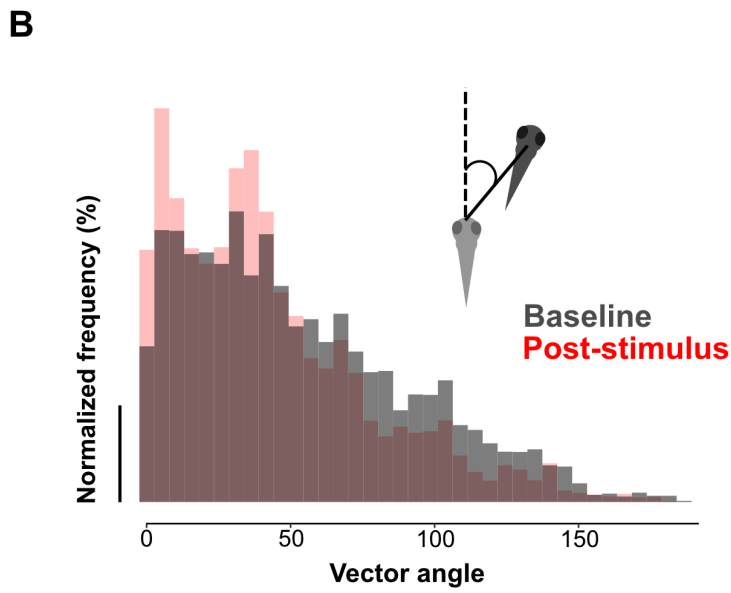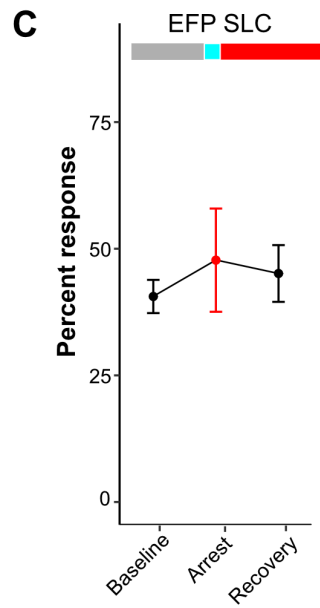

Figure S1

**A**

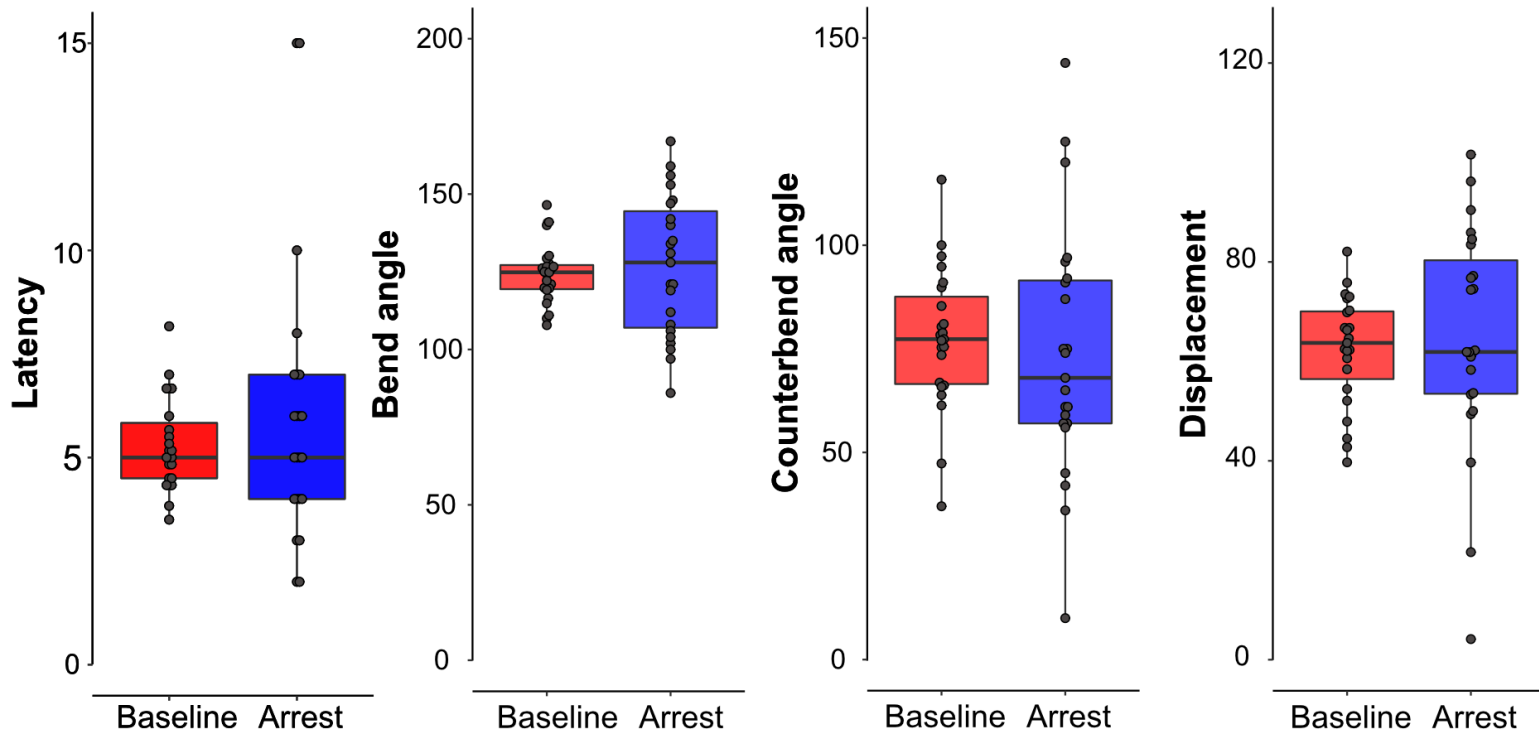

**B**

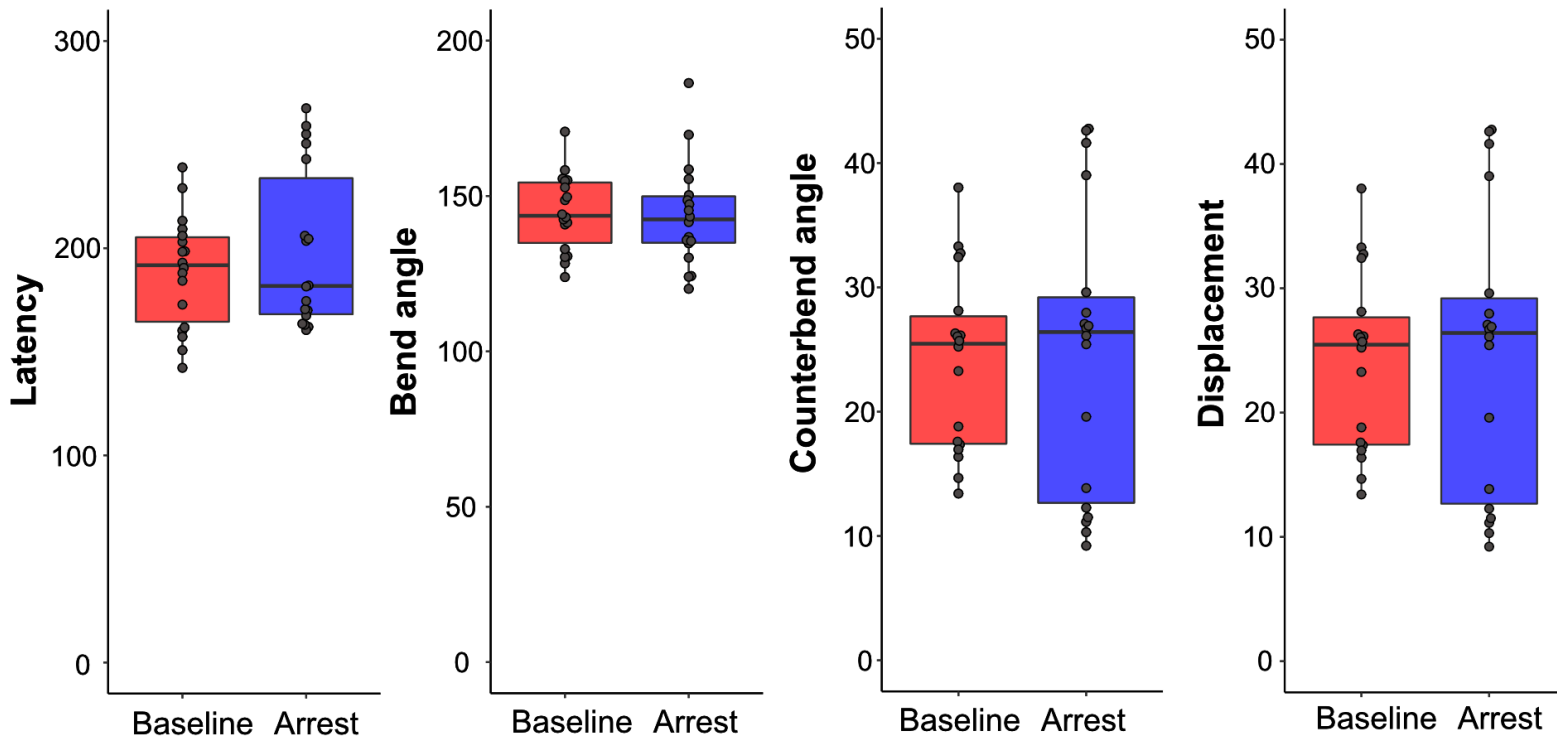

**Figure S2**

**A**

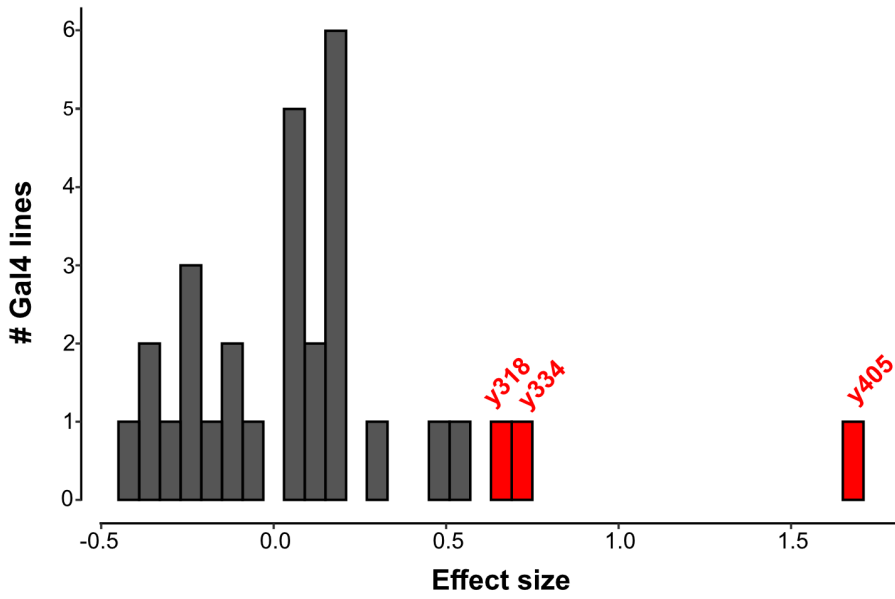

**B**

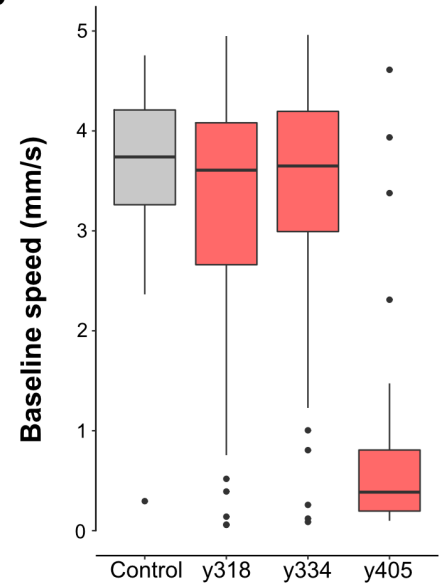

**C**

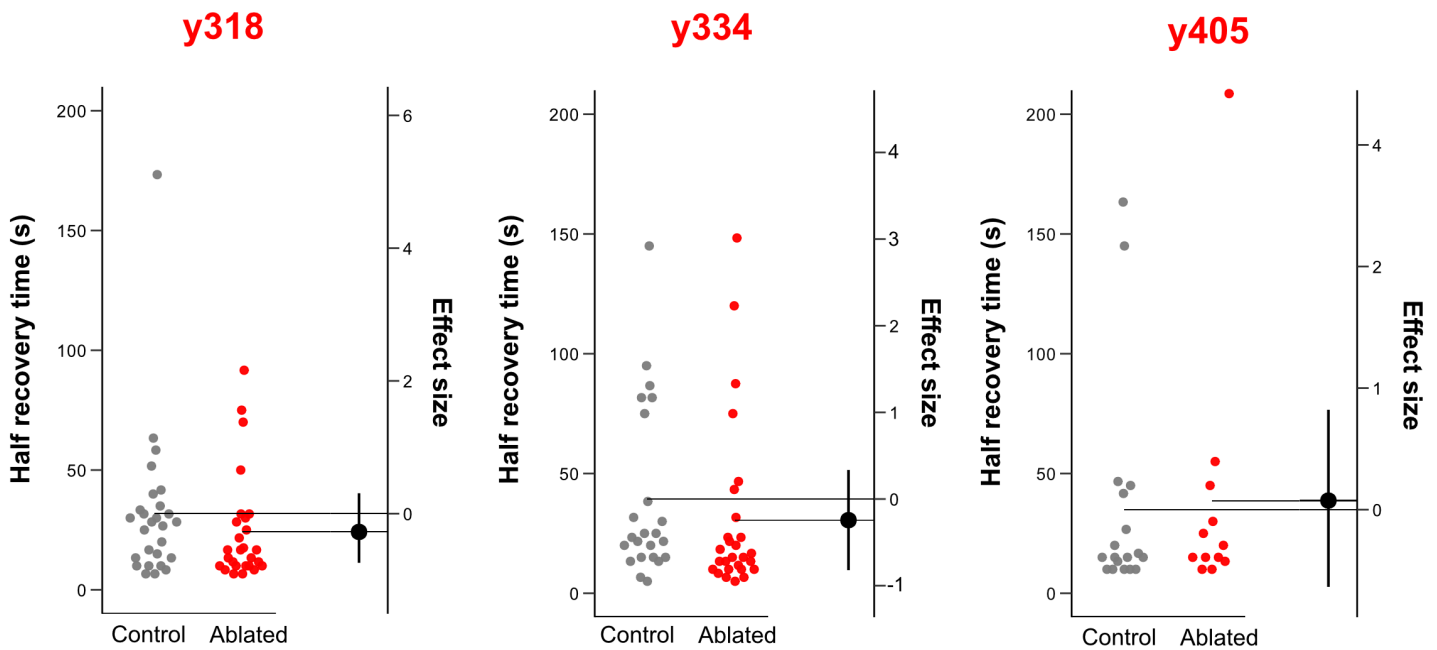

**Figure S3**

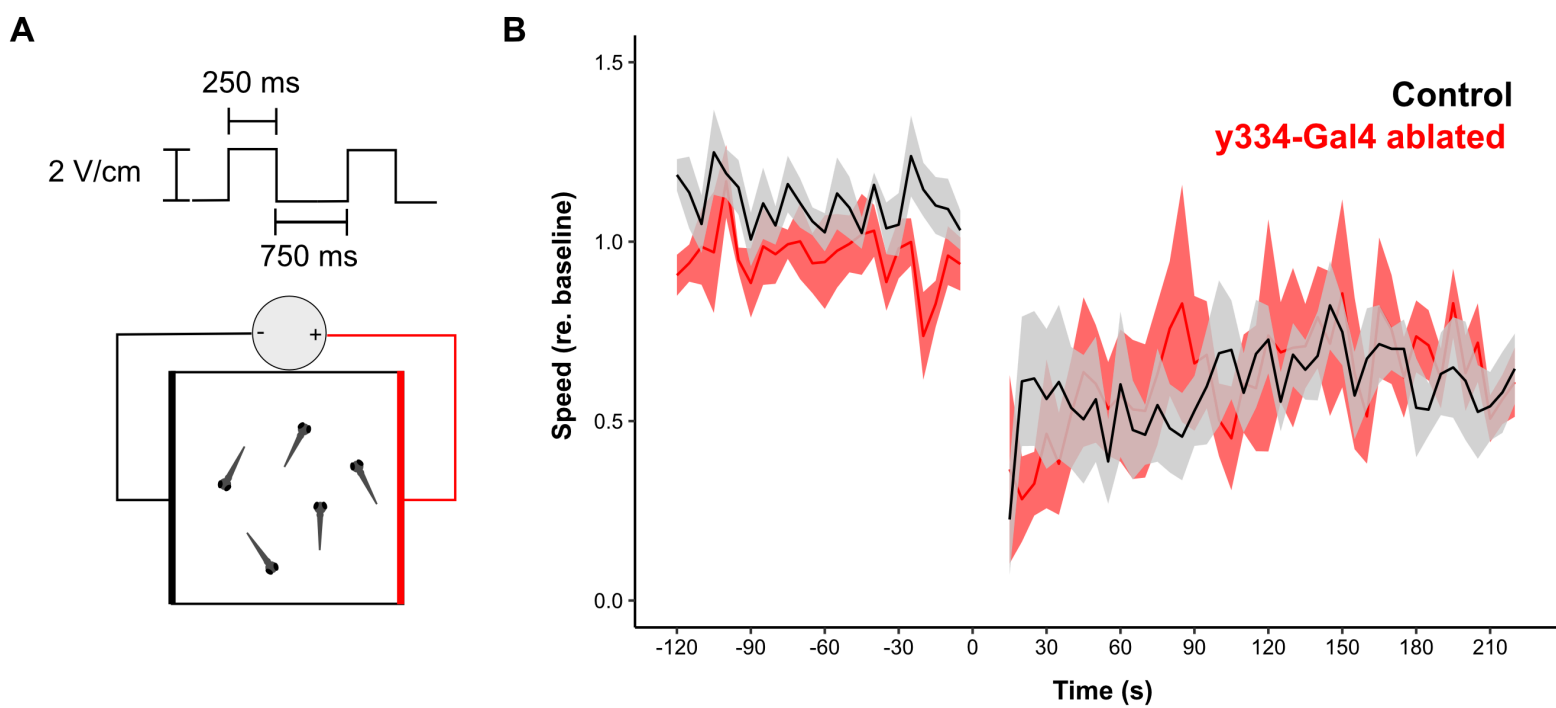

**Figure S4**



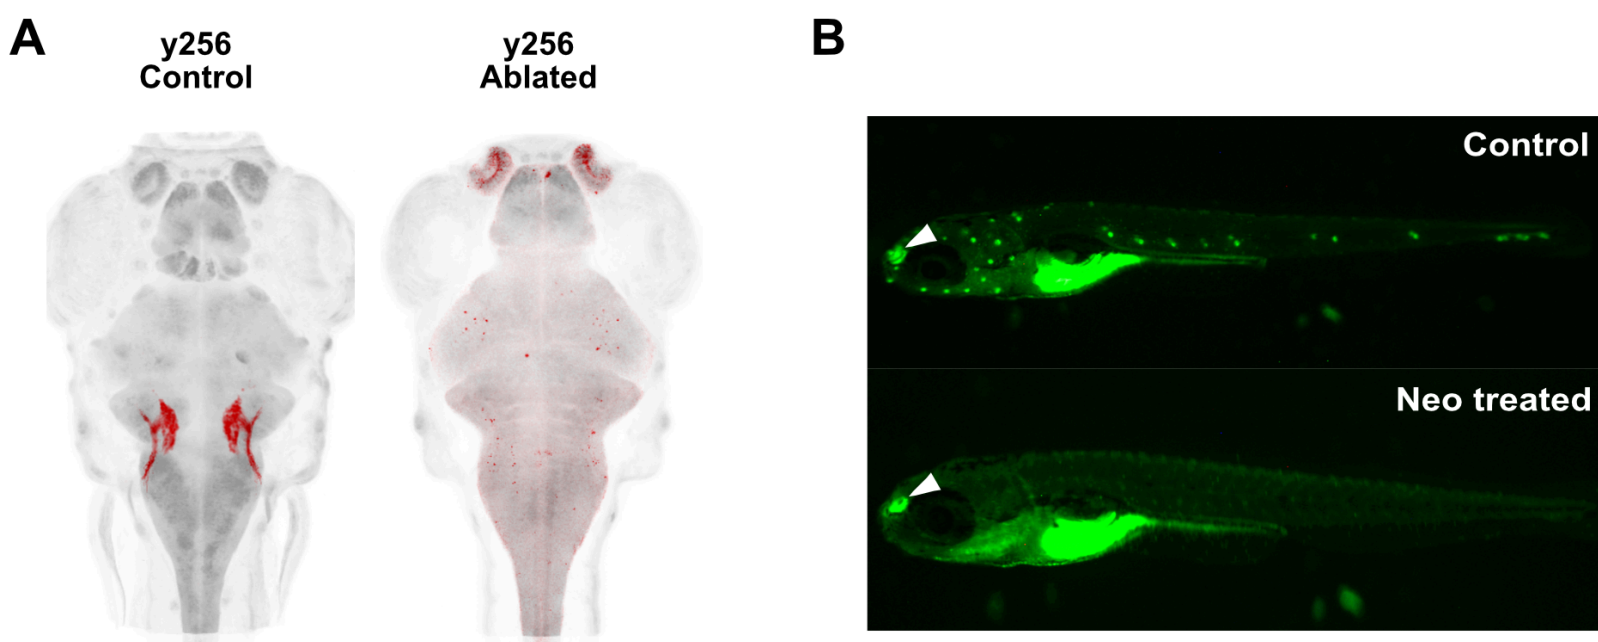

**Figure S5**

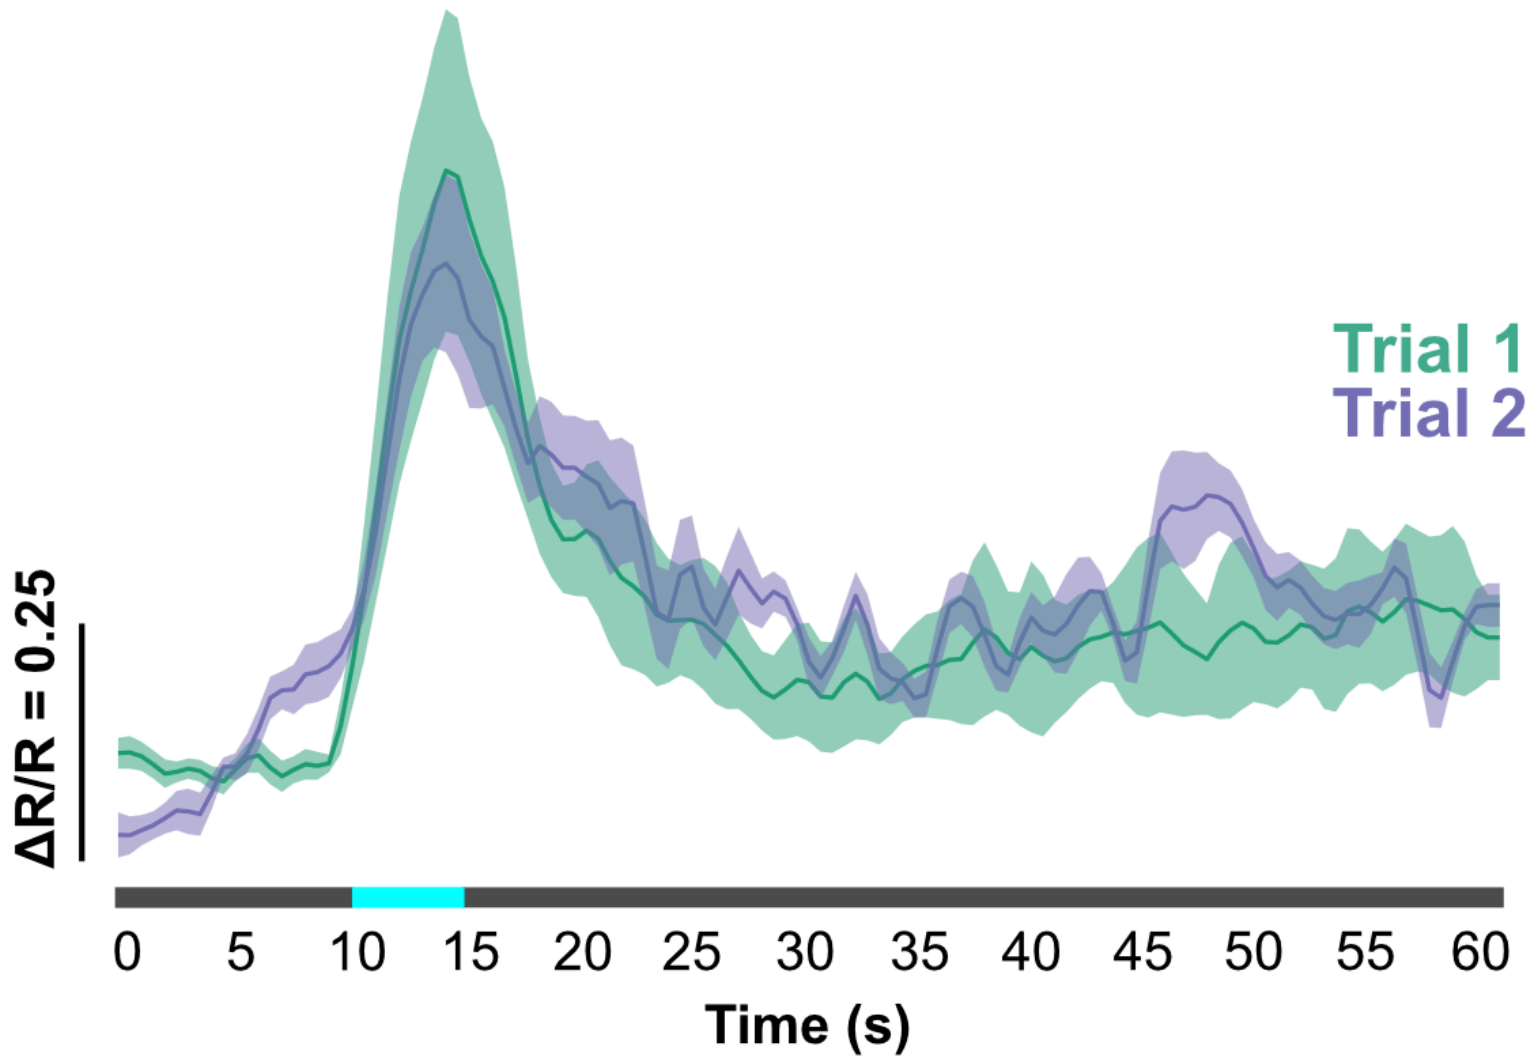

**Figure S7**

Baseline swim speed (mm/s)

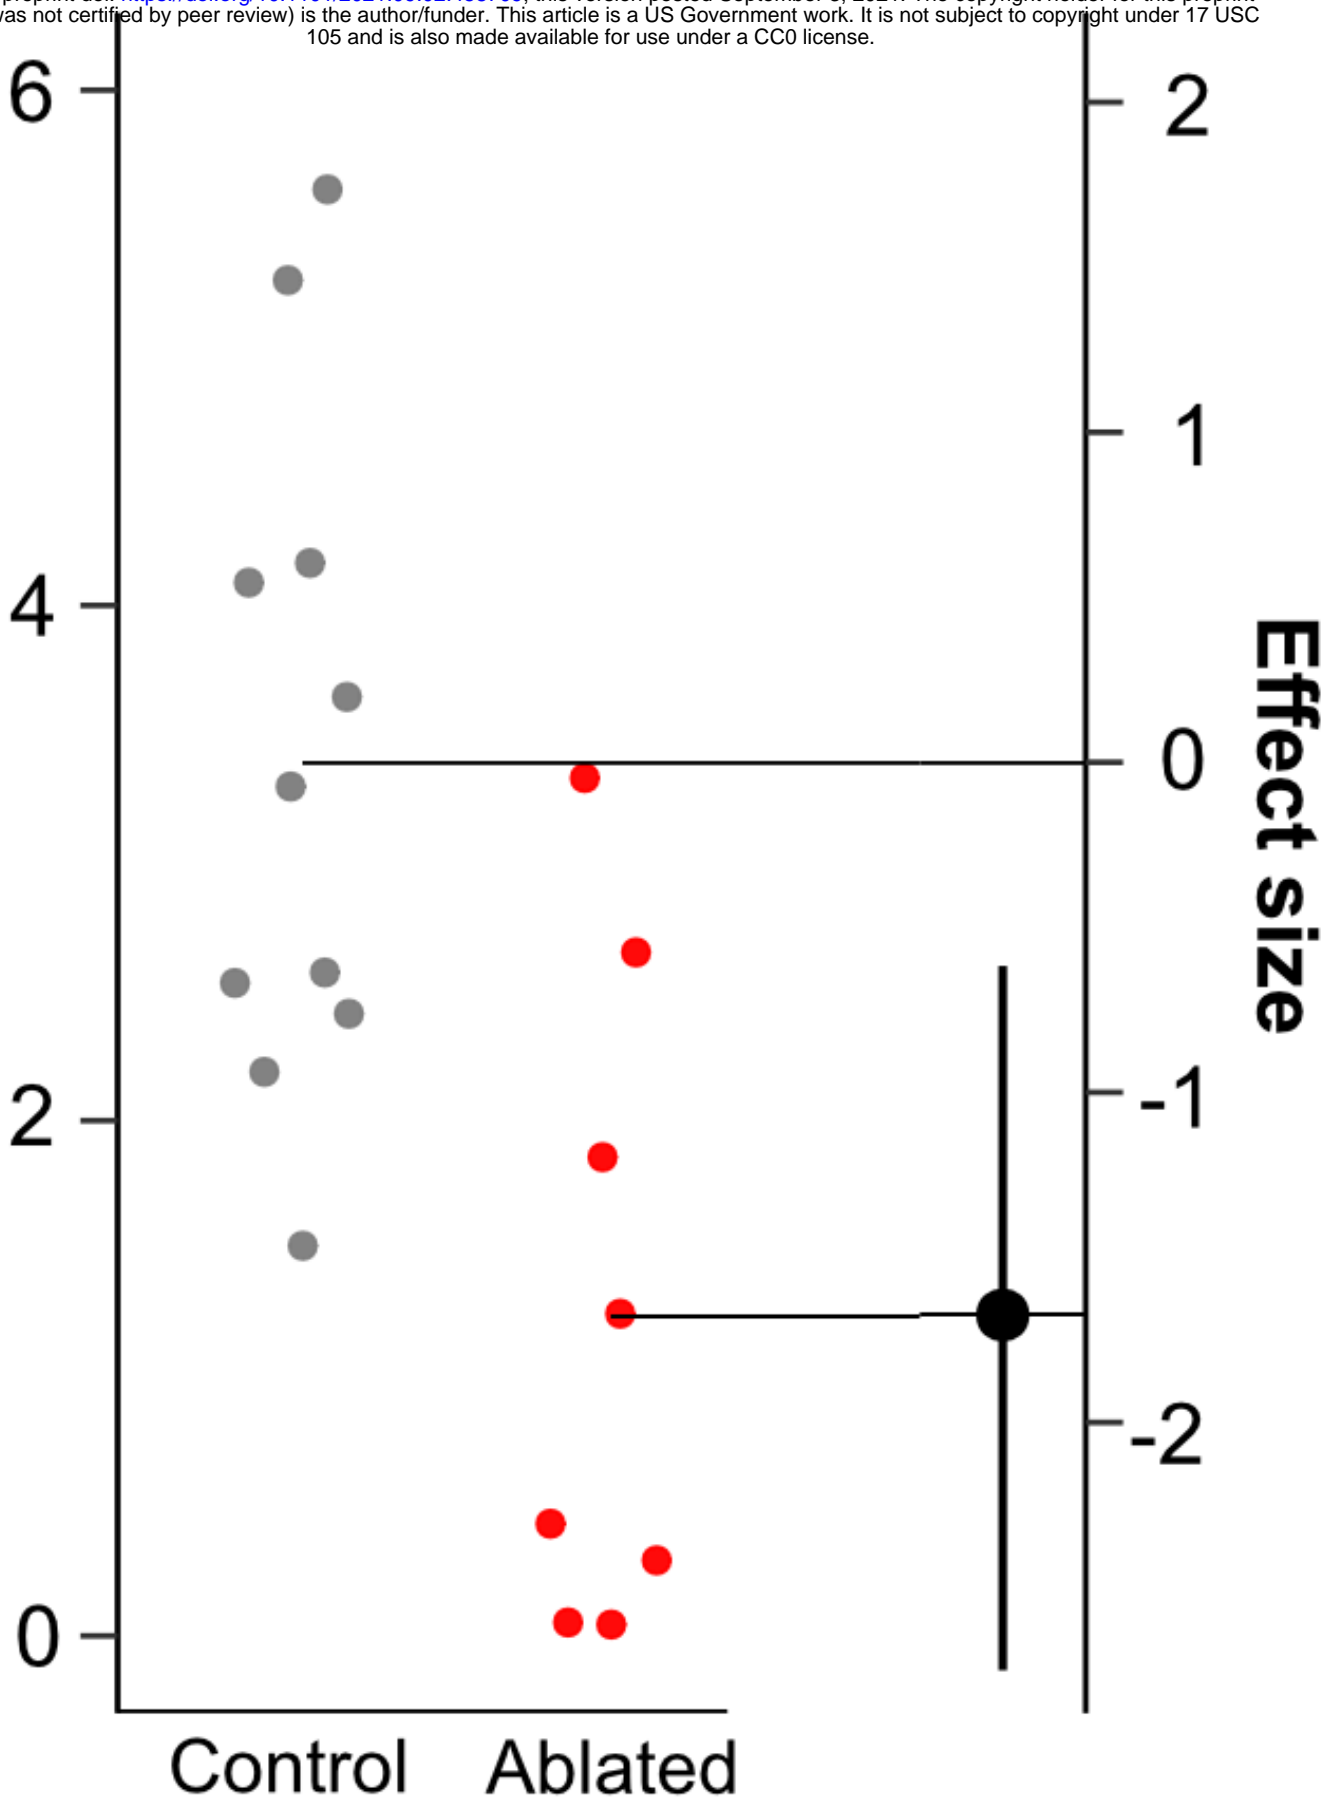

**Figure S8**
